# Supplementary material for: Body mass and growth rates predict protein intake across animals
Source: eLife. 2024 Nov 11;13:e88933. doi: 10.7554/eLife.88933 (PMC11587531; doi:10.7554/eLife.88933)
Supplement: Figure 1—source data 1. [file elife-88933-fig1-data1.xlsx]

## Sheet: Sheet1
Figure 1 - Source Data 1
Instar	Sex	Mass Specific Protein consumption rate (g/g/d)	Mass Specific carb consumption rate (g/g/d)	Protein to carbohydrate ratio
1st	F	0.0542328	0.0341648	1.58739
1st	M	0.0523481	0.0483425	1.08286
1st	M	0.0757009	0.0802127	0.943753
1st	F	0.0489968	0.0421331	1.16291
1st	F	0.0595547	0.0310121	1.92037
1st	F	0.0514516	0.0455242	1.1302
1st	F	0.0569839	0.0352648	1.61589
1st	F	0.0529192	0.0369993	1.43028
1st	F	0.0605487	0.0549314	1.10226
1st	F	0.0408936	0.0397456	1.02888
1st	M	0.0481858	0.0432511	1.11409
1st	M	0.060638	0.0311234	1.94831
1st	F	0.0441661	0.0450222	0.980986
1st	M	0.0465867	0.0373616	1.24691
1st	F	0.0572778	0.0571667	1.00194
1st	F	0.0517871	0.0493916	1.0485
1st	M	0.0416444	0.0380348	1.0949
1st	M	0.0479143	0.0348741	1.37392
1st	M	0.0466398	0.0492958	0.946122
1st	F	0.0458854	0.0413385	1.10999
1st	M	0.0381458	0.0389886	0.978383
1st	F	0.0539574	0.0362633	1.48793
1st	M	0.0393354	0.0331977	1.18488
1st	M	0.0525416	0.0319522	1.64439
1st	F	0.0504924	0.0292515	1.72615
1st	M	0.056673	0.0427073	1.32701
1st	F	0.0592034	0.0363882	1.62699
1st	M	0.0396518	0.0396196	1.00081
1st	F	0.0413721	0.0292793	1.41302
1st	M	0.0677664	0.0395453	1.71364
1st	M	0.055833	0.0618702	0.902421
1st	M	0.0453433	0.0433134	1.04686
1st	F	0.0429315	0.0436384	0.983802
1st	M	0.0331472	0.025471	1.30137
1st	M	0.0452732	0.0411249	1.10087
1st	M	0.0474876	0.0411038	1.15531
1st	M	0.0383389	0.0378405	1.01317
1st	F	0.0453319	0.0419595	1.08037
1st	M	0.0394828	0.036069	1.09465
1st	F	0.0675549	0.0593265	1.1387
1st	M	0.0413967	0.0295536	1.40073
1st	M	0.055988	0.0362703	1.54363
1st	F	0.0582483	0.0530187	1.09864
1st	F	0.0535446	0.0509307	1.05132
1st	F	0.0738065	0.071957	1.0257
1st	F	0.0494391	0.0230629	2.14367
1st	M	0.0576365	0.0447823	1.28704
1st	M	0.0567758	0.0360133	1.57652
1st	M	0.0371436	0.0344589	1.07791
1st	F	0.0585087	0.0303603	1.92714
1st	M	0.0498242	0.0342827	1.45333
1st	M	0.0504742	0.0402887	1.25281
1st	F	0.0479902	0.0425349	1.12825
1st	F	0.0527076	0.0452467	1.16489
1st	F	0.0472877	0.0406419	1.16352
1st	M	0.0669425	0.0634943	1.05431
1st	F	0.0542314	0.0397127	1.36559
1st	M	0.0463542	0.0351042	1.32047
1st	F	0.0580435	0.0345217	1.68136
1st	F	0.0514608	0.0405139	1.2702
1st	F	0.0429092	0.0380605	1.12739
1st	F	0.0406765	0.0365264	1.11362
1st	F	0.068198	0.0369109	1.84764
1st	F	0.0444298	0.040562	1.09535
1st	M	0.051487	0.0474349	1.08542
1st	F	0.0433983	0.0349393	1.24211
1st	M	0.0447782	0.0416724	1.07453
1st	F	0.0595655	0.0389861	1.52786
1st	F	0.0551839	0.0460018	1.1996
1st	M	0.079554	0.0701814	1.13355
1st	F	0.0491754	0.0351017	1.40094
1st	M	0.0414734	0.0397806	1.04255
1st	M	0.0777618	0.0492109	1.58017
1st	F	0.034376	0.0410649	0.837115
1st	F	0.0385611	0.0455272	0.84699
1st	M	0.0270063	0.0490983	0.550046
1st	F	0.0546598	0.0376479	1.45187
1st	M	0.0352145	0.0222574	1.58215
2nd	M	0.0499501	0.0331461	1.50697
2nd	F	0.0529398	0.0548138	0.965812
2nd	M	0.0351671	0.029415	1.19555
2nd	F	0.0341612	0.0422056	0.8094
2nd	F	0.0384049	0.05158	0.744571
2nd	M	0.0465284	0.0468971	0.992139
2nd	F	0.0523138	0.0420761	1.24331
2nd	F	0.0291638	0.0326723	0.892615
2nd	M	0.0685859	0.0548629	1.25013
2nd	M	0.0653798	0.061115	1.06978
2nd	F	0.0713984	0.0532622	1.34051
2nd	F	0.0481481	0.0523482	0.919767
2nd	F	0.0753053	0.0459988	1.63711
2nd	F	0.0468916	0.048794	0.961012
2nd	F	0.0507769	0.0505222	1.00504
2nd	M	0.0400946	0.0422754	0.948415
2nd	M	0.0323816	0.035959	0.900514
2nd	F	0.0372693	0.0373338	0.998272
2nd	M	0.0529066	0.0549328	0.963116
2nd	F	0.0409108	0.037179	1.10037
2nd	M	0.048203	0.0426123	1.1312
2nd	F	0.0338783	0.0396568	0.854286
2nd	M	0.047983	0.0499903	0.959846
2nd	F	0.0342832	0.0371915	0.921801
2nd	F	0.041287	0.0430022	0.960115
2nd	F	0.0555154	0.0532731	1.04209
2nd	F	0.04878	0.02857	1.70739
2nd	F	0.0464777	0.0381225	1.21917
2nd	M	0.0463646	0.0463799	0.99967
2nd	F	0.0549092	0.0432893	1.26842
2nd	M	0.0694991	0.0441826	1.573
2nd	F	0.0855051	0.0552526	1.54753
2nd	M	0.0506709	0.0461574	1.09779
2nd	M	0.0775541	0.0357568	2.16893
2nd	M	0.0368629	0.0361685	1.0192
2nd	F	0.0357352	0.036002	0.992587
2nd	M	0.0664717	0.0489116	1.35902
2nd	F	0.0564167	0.0581833	0.969636
2nd	F	0.0508358	0.0391628	1.29806
2nd	F	0.0455871	0.0406754	1.12075
2nd	F	0.0808593	0.0771019	1.04873
2nd	F	0.102161	0.0756921	1.34969
2nd	F	0.0319933	0.0391481	0.817237
2nd	M	0.0452593	0.0532045	0.850667
2nd	F	0.0544252	0.0546604	0.995697
2nd	M	0.0448376	0.042359	1.05851
2nd	M	0.0598473	0.0673058	0.889184
2nd	M	0.0467994	0.0477261	0.980583
2nd	M	0.0443468	0.0397546	1.11551
2nd	F	0.0469724	0.0393509	1.19368
2nd	M	0.0519459	0.0589881	0.880616
2nd	M	0.0489681	0.0481835	1.01628
2nd	F	0.0388889	0.0476061	0.816888
2nd	M	0.0672601	0.0690801	0.973654
2nd	F	0.0346592	0.0343063	1.01029
2nd	F	0.0401494	0.0333112	1.20528
2nd	M	0.0446193	0.051418	0.867775
2nd	F	0.046969	0.0436371	1.07635
2nd	F	0.0388493	0.0373691	1.03961
2nd	M	0.0417668	0.0324312	1.28786
2nd	M	0.0394918	0.0346299	1.1404
2nd	F	0.0459657	0.0292929	1.56917
2nd	M	0.0410594	0.0478765	0.85761
2nd	F	0.0570366	0.0382037	1.49296
2nd	F	0.0365677	0.0323691	1.12971
2nd	F	0.0431556	0.0373038	1.15687
2nd	F	0.0422783	0.0418466	1.01032
2nd	F	0.0530907	0.0401791	1.32135
2nd	M	0.0640388	0.0554944	1.15397
2nd	F	0.0689332	0.0563056	1.22427
2nd	M	0.0494889	0.0388615	1.27347
2nd	F	0.0363498	0.0514829	0.706056
2nd	M	0.0353432	0.0320083	1.10419
2nd	M	0.0504573	0.0325295	1.55112
2nd	M	0.0406165	0.0428075	0.948818
2nd	M	0.0467031	0.0313418	1.49012
2nd	F	0.0490301	0.0384214	1.27612
2nd	M	0.0587084	0.0528975	1.10985
2nd	M	0.0477106	0.029455	1.61978
2nd	M	0.0609744	0.0632358	0.964239
2nd	M	0.069	0.0473766	1.45641
2nd	M	0.0484676	0.0354382	1.36767
2nd	M	0.0479556	0.041511	1.15525
2nd	F	0.0387333	0.0418266	0.926045
2nd	M	0.0480845	0.0507089	0.948245
2nd	M	0.0448976	0.04365	1.02858
2nd	F	0.069678	0.0578149	1.20519
2nd	M	0.0543227	0.0439763	1.23527
2nd	M	0.0532288	0.039791	1.33771
2nd	M	0.0706146	0.0450776	1.56651
2nd	F	0.0458046	0.041985	1.09098
2nd	F	0.0400906	0.0357799	1.12048
2nd	F	0.0515257	0.0504146	1.02204
2nd	F	0.0562539	0.0420279	1.33849
2nd	F	0.0472177	0.0384147	1.22916
2nd	F	0.0362286	0.0310381	1.16723
2nd	M	0.059584	0.0572804	1.04022
3rd	M	0.0404112	0.0229612	1.75998
3rd	M	0.0424327	0.0270009	1.57153
3rd	F	0.0561748	0.0325457	1.72603
3rd	F	0.054328	0.053138	1.0224
3rd	F	0.0421773	0.0193419	2.18062
3rd	M	0.0353059	0.0193253	1.82692
3rd	F	0.0519453	0.0362434	1.43324
3rd	F	0.0368703	0.0293035	1.25822
3rd	M	0.034829	0.0263577	1.3214
3rd	F	0.0496071	0.0295363	1.67953
3rd	M	0.0403364	0.0446231	0.903937
3rd	M	0.052703	0.0349154	1.50945
3rd	M	0.0486179	0.0160364	3.03172
3rd	F	0.0592113	0.0254661	2.3251
3rd	F	0.0325624	0.0380196	0.856462
3rd	M	0.0476789	0.0420512	1.13383
3rd	F	0.0504613	0.0432735	1.1661
3rd	M	0.0566178	0.0170548	3.31975
3rd	F	0.038385	0.0365301	1.05078
3rd	M	0.0534419	0.0246708	2.1662
3rd	F	0.045692	0.0276344	1.65345
3rd	M	0.0371289	0.0332738	1.11586
3rd	F	0.0483553	0.0261574	1.84863
3rd	F	0.0419725	0.024489	1.71393
3rd	M	0.0514648	0.0360883	1.42608
3rd	F	0.0564062	0.0313882	1.79705
3rd	F	0.0389959	0.0337735	1.15463
3rd	F	0.0364974	0.020814	1.75351
3rd	F	0.0434585	0.0210802	2.06158
3rd	M	0.0432066	0.0291231	1.48358
3rd	M	0.0402091	0.0374061	1.07493
3rd	M	0.049126	0.0113164	4.34113
3rd	F	0.0618129	0.0649424	0.951811
3rd	F	0.0279743	0.0381783	0.732726
3rd	M	0.0359056	0.0285962	1.2556
3rd	F	0.0426837	0.0182403	2.34008
3rd	F	0.0494112	0.0569214	0.868061
3rd	M	0.0338572	0.039617	0.854613
3rd	F	0.0500275	0.0439162	1.13916
3rd	M	0.0404439	0.0206496	1.95857
3rd	M	0.0369509	0.0272234	1.35732
3rd	F	0.0347178	0.0259594	1.33739
3rd	F	0.0510148	0.0431749	1.18159
3rd	F	0.0398791	0.0250423	1.59247
3rd	M	0.0459166	0.030307	1.51505
3rd	F	0.0306445	0.0310097	0.988225
3rd	F	0.025723	0.0242796	1.05945
3rd	M	0.0326435	0.0206125	1.58367
3rd	F	0.0335327	0.0322026	1.0413
3rd	M	0.0328364	0.0296294	1.10824
3rd	M	0.0281568	0.0238923	1.17849
3rd	M	0.035003	0.0233293	1.50039
3rd	M	0.036582	0.0302469	1.20945
3rd	F	0.0385227	0.0149637	2.57442
3rd	M	0.0443196	0.0253639	1.74735
3rd	M	0.0422268	0.0418337	1.0094
3rd	M	0.0415697	0.0276484	1.50351
3rd	F	0.0314643	0.0232537	1.35309
3rd	F	0.0474576	0.0246348	1.92644
3rd	M	0.0329428	0.0254055	1.29668
3rd	M	0.0318587	0.0205795	1.54808
3rd	M	0.0404734	0.0275027	1.47162
3rd	F	0.0379201	0.0211606	1.79202
3rd	F	0.0453816	0.0433219	1.04754
3rd	M	0.0414864	0.0119039	3.48511
3rd	M	0.0312513	0.00923176	3.3852
3rd	F	0.0400584	0.0371907	1.07711
3rd	F	0.0508129	0.0294939	1.72283
3rd	F	0.0386687	0.0381949	1.0124
3rd	F	0.0496958	0.0147932	3.35937
3rd	M	0.0514101	0.0282016	1.82295
3rd	M	0.0356971	0.0219641	1.62525
3rd	M	0.037828	0.0242588	1.55935
3rd	F	0.0363988	0.0323032	1.12679
3rd	M	0.0388098	0.0299335	1.29653
3rd	M	0.0300909	0.0239367	1.2571
3rd	F	0.0505716	0.0390247	1.29589
3rd	F	0.0441602	0.0236911	1.864
3rd	F	0.050214	0.0258779	1.94042
3rd	M	0.0211628	0.0241425	0.876579
3rd	M	0.0364711	0.0222148	1.64175
3rd	F	0.0319543	0.019525	1.63659
3rd	M	0.0318921	0.0355256	0.897722
3rd	F	0.0516432	0.0184064	2.80572
3rd	M	0.0370595	0.0196036	1.89044
3rd	M	0.0390472	0.0275645	1.41658
3rd	F	0.0252361	0.022974	1.09846
3rd	F	0.0276354	0.023635	1.16926
3rd	F	0.0401261	0.0442318	0.907177
3rd	M	0.0279877	0.0360139	0.777137
3rd	M	0.0387863	0.0380149	1.02029
3rd	M	0.0297387	0.0246574	1.20608
3rd	M	0.0380654	0.0229137	1.66125
3rd	F	0.0280061	0.0305182	0.917684
3rd	M	0.0279801	0.0320626	0.872671
3rd	M	0.0198801	0.0203914	0.974928
3rd	M	0.041569	0.0363414	1.14385
3rd	F	0.0372368	0.0167895	2.21787
4th	F	0.0667512	0.0393301	1.69721
4th	M	0.0300403	0.0450636	0.66662
4th	F	0.0395171	0.0253415	1.55938
4th	F	0.039724	0.0261448	1.51939
4th	F	0.025207	0.0337239	0.74745
4th	F	0.0304167	0.0373243	0.814931
4th	F	0.0401253	0.0246796	1.62585
4th	M	0.0330159	0.0354149	0.93226
4th	M	0.0311925	0.0409214	0.762254
4th	M	0.0358515	0.027767	1.29115
4th	M	0.0319366	0.0359087	0.889383
4th	F	0.0309849	0.031098	0.996364
4th	M	0.0390598	0.026116	1.49563
4th	F	0.046827	0.0243848	1.92034
4th	F	0.0405306	0.0235345	1.72218
4th	F	0.0408172	0.0306342	1.3324
4th	M	0.0326275	0.0259685	1.25643
4th	F	0.0320047	0.0329279	0.971963
4th	F	0.029438	0.0267376	1.101
4th	M	0.0296636	0.0345733	0.857991
4th	M	0.0432015	0.0294618	1.46636
4th	F	0.0415009	0.0285025	1.45604
4th	M	0.038972	0.0209415	1.86099
4th	F	0.0377137	0.0493086	0.764849
4th	F	0.0342076	0.0345194	0.990969
4th	F	0.0444994	0.0276905	1.60703
4th	M	0.0304773	0.0301379	1.01126
4th	F	0.0264509	0.0449317	0.588691
4th	M	0.0391452	0.0197712	1.97991
4th	M	0.0282642	0.0253399	1.1154
4th	F	0.0263277	0.0340071	0.774183
4th	M	0.0459616	0.0281622	1.63203
4th	F	0.0344439	0.0418834	0.822377
4th	F	0.0329869	0.0383095	0.861062
4th	F	0.0399786	0.0317049	1.26096
4th	M	0.0326215	0.0386413	0.844212
4th	M	0.0338492	0.0298434	1.13423
4th	M	0.0398965	0.0341105	1.16963
4th	M	0.0390936	0.0170225	2.29658
4th	M	0.0290536	0.0532167	0.545948
4th	F	0.0333886	0.0341967	0.976368
4th	M	0.0461612	0.0321108	1.43756
4th	F	0.0473272	0.0242007	1.95561
4th	F	0.0355916	0.0319662	1.11341
4th	F	0.0369284	0.0361282	1.02215
4th	M	0.0328626	0.04141	0.793591
4th	M	0.0306247	0.0382377	0.800905
4th	F	0.0289838	0.0287775	1.00717
4th	M	0.0474534	0.0296415	1.60091
4th	M	0.0359209	0.0326965	1.09861
4th	M	0.0375925	0.0416191	0.903251
4th	M	0.0275912	0.0325936	0.846522
4th	M	0.0253375	0.0460969	0.549658
4th	F	0.0438229	0.0148556	2.94993
4th	M	0.0458881	0.0486995	0.942272
4th	M	0.0328128	0.0350414	0.936402
4th	M	0.0369122	0.0241442	1.52883
4th	M	0.0418624	0.0297991	1.40482
4th	F	0.0330941	0.0256234	1.29156
4th	M	0.0324429	0.0324707	0.999144
4th	F	0.0364907	0.0249673	1.46154
4th	M	0.0418346	0.0310588	1.34695
4th	M	0.046306	0.0317585	1.45807
4th	M	0.0266678	0.0401098	0.66487
4th	F	0.0350175	0.0168466	2.07861
4th	M	0.0368116	0.0346739	1.06165
4th	M	0.0353212	0.0261438	1.35104
4th	F	0.0426353	0.0289003	1.47526
4th	M	0.0349475	0.0215062	1.625
4th	F	0.0290802	0.0466556	0.623296
4th	M	0.0373555	0.0222111	1.68184
4th	F	0.0437292	0.0322714	1.35504
4th	M	0.036003	0.0363823	0.989576
4th	M	0.0414693	0.0463778	0.894163
4th	M	0.041813	0.0304363	1.37379
4th	F	0.0345747	0.020695	1.67068
4th	M	0.0501218	0.0230431	2.17514
4th	M	0.0361872	0.0453163	0.798547
4th	M	0.0270757	0.0359563	0.753018
4th	F	0.0395857	0.0255494	1.54938
4th	M	0.0527839	0.0476713	1.10725
4th	F	0.0333547	0.0468369	0.712146
4th	M	0.0326815	0.0300135	1.0889
4th	M	0.041738	0.0162415	2.56984
4th	M	0.038634	0.0454822	0.849432
4th	F	0.041044	0.0408208	1.00547
4th	M	0.034237	0.0329914	1.03775
4th	F	0.0361897	0.0343943	1.0522
4th	M	0.0299689	0.0302088	0.992058
4th	M	0.0343753	0.0445111	0.772288
4th	M	0.036308	0.0214798	1.69033
4th	F	0.0301576	0.0359269	0.839416
4th	M	0.0455835	0.0333516	1.36676
4th	M	0.0349178	0.0210849	1.65606
4th	M	0.0353992	0.0242702	1.45855
4th	F	0.0340478	0.0301198	1.13041
4th	M	0.0317076	0.024247	1.30769
4th	M	0.0415631	0.0377244	1.10176
5th	M	0.0315149	0.0278561	1.13135
5th	M	0.0222843	0.0341733	0.652097
5th	M	0.0329	0.0394415	0.834147
5th	M	0.0381605	0.0254732	1.49806
5th	F	0.0360955	0.0366057	0.986063
5th	M	0.03642	0.0365987	0.995119
5th	F	0.0334125	0.0330159	1.01201
5th	M	0.0268285	0.0371095	0.722955
5th	F	0.0298021	0.0332034	0.89756
5th	M	0.0277159	0.0336295	0.824154
5th	M	0.0350259	0.0217124	1.61318
5th	M	0.0293818	0.0202176	1.45328
5th	M	0.0336981	0.0311962	1.0802
5th	M	0.0344149	0.0454378	0.757406
5th	F	0.0342464	0.0480988	0.712001
5th	M	0.028753	0.0415877	0.691383
5th	F	0.029671	0.0370504	0.800828
5th	F	0.0363232	0.058893	0.616765
5th	F	0.0306197	0.0266551	1.14874
5th	M	0.0272598	0.0353829	0.770423
5th	F	0.0276326	0.0463426	0.596268
5th	F	0.0234451	0.0370643	0.632552
5th	M	0.0259455	0.037779	0.686771
5th	M	0.0260191	0.0275064	0.945928
5th	M	0.0340295	0.0207466	1.64024
5th	M	0.0346314	0.0396463	0.87351
5th	M	0.0353252	0.0229806	1.53717
5th	M	0.0328584	0.0329174	0.998208
5th	M	0.0344944	0.0401364	0.85943
5th	M	0.034837	0.04255	0.81873
5th	M	0.030279	0.0291191	1.03983
5th	M	0.0275004	0.0253105	1.08652
5th	F	0.0293543	0.0301739	0.972836
5th	F	0.0307622	0.0302185	1.01799
5th	F	0.0357323	0.0276996	1.28999
5th	F	0.0290849	0.0407285	0.714116
5th	F	0.033616	0.0270126	1.24446
5th	M	0.0260389	0.0424623	0.613225
5th	M	0.0350711	0.0408	0.859586
5th	F	0.029567	0.0471067	0.627662
5th	M	0.023475	0.0405366	0.579106
5th	M	0.0252988	0.0428905	0.589846
5th	M	0.0331506	0.0326352	1.01579
5th	M	0.0346391	0.0419047	0.826615
5th	F	0.0450306	0.0587453	0.76654
5th	M	0.02202	0.0370697	0.594017
5th	M	0.0283533	0.0222585	1.27382
5th	M	0.0324505	0.0310586	1.04481
5th	M	0.0347763	0.0440582	0.789327
5th	F	0.03091	0.0284471	1.08658
5th	F	0.0255007	0.0441751	0.577263
5th	M	0.0287484	0.0391476	0.73436
5th	F	0.0222561	0.0466716	0.476866
5th	M	0.021496	0.054979	0.390986
5th	M	0.0287206	0.0247562	1.16014
5th	M	0.03332	0.0335015	0.994585
5th	M	0.0353851	0.0284398	1.24421
5th	M	0.0301671	0.0380518	0.792792
5th	F	0.0353508	0.031277	1.13025
5th	F	0.035784	0.0329468	1.08611
5th	F	0.0323837	0.0317402	1.02027
5th	M	0.0332476	0.0341454	0.973708
5th	F	0.0280204	0.0263772	1.0623
5th	M	0.0496451	0.0304835	1.62859
5th	M	0.0350257	0.0290942	1.20388
5th	M	0.0322923	0.0457255	0.70622
5th	M	0.0174622	0.0110254	1.58381
5th	M	0.0365222	0.0167644	2.17856
5th	F	0.0354891	0.0233207	1.52179
5th	M	0.0300017	0.0378838	0.791941
5th	F	0.0284802	0.0309325	0.920722
5th	F	0.0228493	0.0535721	0.426516
5th	F	0.0378677	0.0446151	0.848765
5th	M	0.0267417	0.0326645	0.818677
5th	M	0.0398188	0.0241212	1.65078
5th	M	0.0172065	0.0260354	0.660891
5th	M	0.0339839	0.034845	0.975287
5th	M	0.0345127	0.0218903	1.57662
5th	F	0.0425355	0.0337465	1.26044
5th	F	0.0301381	0.0291251	1.03478
5th	F	0.0299529	0.0308839	0.969853
5th	F	0.0244193	0.0463848	0.52645
5th	M	0.033364	0.0162602	2.05188
5th	M	0.031827	0.0235016	1.35425
5th	F	0.0271618	0.0387142	0.701598
5th	M	0.0332417	0.0253936	1.30906
5th	M	0.029969	0.0234859	1.27604
5th	F	0.0229169	0.0242851	0.943662
5th	F	0.0259331	0.0279008	0.929475
5th	F	0.0182112	0.0428973	0.42453
6th	M	0.0201203	0.0483414	0.416212
6th	M	0.0251796	0.0404221	0.622919
6th	M	0.0261346	0.0329571	0.792988
6th	F	0.0285161	0.032931	0.865934
6th	F	0.0271368	0.0417182	0.65048
6th	M	0.0373252	0.0340361	1.09664
6th	M	0.0273114	0.0368497	0.741156
6th	M	0.0309542	0.0490558	0.631001
6th	M	0.0339048	0.0363334	0.933158
6th	M	0.0119735	0.0234834	0.50987
6th	M	0.0275139	0.038698	0.71099
6th	M	0.0225395	0.0308483	0.730655
6th	F	0.0190364	0.0471744	0.403534
6th	F	0.0219746	0.0445594	0.493152
6th	F	0.0290359	0.0261136	1.11191
6th	F	0.0263375	0.026505	0.993683
6th	F	0.021228	0.0368892	0.575453
6th	F	0.0297105	0.0373903	0.794603
6th	F	0.0287878	0.0288378	0.998266
6th	F	0.024106	0.0442739	0.544474
6th	F	0.027874	0.0251551	1.10809
6th	F	0.0256239	0.0228653	1.12065
6th	M	0.0261916	0.0308614	0.848685
6th	M	0.0288491	0.0299102	0.964523
6th	M	0.0239324	0.0283186	0.845112
6th	M	0.0210326	0.057036	0.36876
6th	F	0.0129476	0.0288477	0.448826
6th	F	0.0304567	0.0232277	1.31122
6th	F	0.0242767	0.0340759	0.71243
6th	M	0.0250283	0.0377608	0.662813
6th	M	0.0270633	0.0279142	0.969519
6th	M	0.0270141	0.0449565	0.600894
6th	F	0.0204445	0.033082	0.617994
6th	M	0.0174216	0.0340414	0.511777
6th	F	0.0207122	0.0471408	0.439368
6th	F	0.00759575	0.018639	0.40752
6th	F	0.0195086	0.0266816	0.731162
6th	M	0.0276602	0.0282451	0.979291
6th	F	0.0318344	0.0289489	1.09967
6th	M	0.0356741	0.0423833	0.841702
6th	F	0.0287451	0.0297689	0.965606
6th	F	0.0152274	0.0384614	0.395915
6th	M	0.0261239	0.0379064	0.689169
6th	F	0.0266402	0.0248897	1.07033
6th	M	0.0278573	0.0248358	1.12166
6th	F	0.0224341	0.0355436	0.631172
6th	M	0.0230627	0.0464118	0.496914
6th	M	0.0247547	0.0270947	0.913635
6th	M	0.0268748	0.0313243	0.857953
6th	M	0.0261131	0.0378057	0.690718
6th	M	0.0266031	0.0308112	0.863423
6th	M	0.0347577	0.0328422	1.05832
6th	M	0.0212539	0.0238262	0.892039
6th	M	0.0350528	0.0408423	0.858248
Adult	F	0.0138233	0.0264753	0.52212
Adult	F	0.013046	0.0362497	0.359891
Adult	F	0.0135234	0.0371824	0.363705
Adult	M	0.0126321	0.0313537	0.40289
Adult	M	0.0133484	0.0366049	0.364661
Adult	M	0.0125935	0.0394284	0.319401
Adult	F	0.0131579	0.035063	0.375263
Adult	F	0.0145321	0.0336886	0.431364
Adult	M	0.0165554	0.0389092	0.425489
Adult	M	0.0163521	0.03968	0.4121
Adult	M	0.0114596	0.0370854	0.309007
Adult	F	0.0100008	0.0331945	0.301277
Adult	M	0.0118044	0.0388459	0.303876
Adult	M	0.0133062	0.0362823	0.36674
Adult	M	0.0111588	0.038943	0.286542
Adult	F	0.0160463	0.032945	0.487065
Adult	M	0.0189765	0.0382318	0.496353
Adult	M	0.0156859	0.0411969	0.380754
Adult	F	0.0138888	0.0322741	0.430339
Adult	F	0.0190564	0.0382404	0.498331
Adult	F	0.0118714	0.0260242	0.456166
Adult	M	0.0162579	0.0431457	0.376815
Adult	M	0.0162477	0.0366956	0.442771
Adult	F	0.014155	0.0333834	0.424013
Adult	F	0.0120498	0.0344878	0.349393
Adult	M	0.0173456	0.0365249	0.474899
Adult	M	0.0146524	0.0346705	0.422617
Adult	F	0.00936418	0.0343898	0.272295
Adult	F	0.0166658	0.036066	0.462092
Adult	F	0.0143905	0.0364231	0.395091
Adult	M	0.0121965	0.0414105	0.294527
Adult	F	0.0114827	0.0370531	0.309897
Adult	F	0.0108968	0.0309185	0.352435
Adult	F	0.0208112	0.0377566	0.551194
Adult	M	0.0129938	0.0414809	0.313247
Adult	M	0.0132129	0.0398524	0.331546
Adult	F	0.0126397	0.0364363	0.346899
Adult	M	0.0158574	0.0387926	0.408774
Adult	M	0.0112366	0.0393094	0.28585
Adult	M	0.0177098	0.0385788	0.459056
Adult	M	0.0261389	0.0396577	0.659113
Adult	F	0.0102996	0.0340512	0.302474
Adult	M	0.0146074	0.0334473	0.436729
Adult	M	0.0140425	0.0358885	0.391281
Adult	F	0.0127333	0.0349526	0.364302
Adult	F	0.0132535	0.0349306	0.379423
Adult	M	0.0176384	0.0364751	0.483572
Adult	F	0.0119392	0.0332479	0.359096
Adult	M	0.0186968	0.0372967	0.501299
Adult	M	0.0123475	0.0375794	0.328571
Adult	M	0.0120109	0.0465045	0.258273
Adult	F	0.0118488	0.0281745	0.42055
Adult	F	0.0117865	0.0395478	0.298033
