# Supplementary material for: Body mass and growth rates predict protein intake across animals
Source: eLife. 2024 Nov 11;13:e88933. doi: 10.7554/eLife.88933 (PMC11587531; doi:10.7554/eLife.88933)
Supplement: Figure 1—source data 2. [file elife-88933-fig1-data2.xlsx]

## Sheet: Sheet1
Figure 1 - Source Data 2			Field-collected locusts
Instar	Sex	Mass Specific Protein consumption rate (g/g/d)	Mass Specific carb consumption rate (g/g/d)	Protein to carbohydrate ratio
5th	M	0.0376768	0.0413908	0.910268
5th	M	0.038117	0.0452926	0.841573
5th	M	0.0477946	0.0799396	0.597884
5th	M	0.018749	0.0440218	0.425901
5th	M	0.0196058	0.0509751	0.384615
5th	M	0.0216989	0.0526973	0.411765
5th	M	0.0260499	0.0385655	0.675472
5th	M	0.0312731	0.061088	0.511936
5th	M	0.027451	0.0552763	0.496614
5th	M	0.0198039	0.0487255	0.406439
5th	F	0.0251961	0.0648039	0.388805
5th	F	0.0483691	0.0736051	0.657143
5th	F	0.0295158	0.0399201	0.739371
5th	F	0.0205839	0.0521874	0.394423
5th	F	0.0212121	0.0515789	0.411255
6th	M	0.0363248	0.0400855	0.906183
6th	M	0.0348546	0.0669834	0.520347
6th	M	0.0470705	0.128737	0.365633
6th	M	0.0242614	0.0719886	0.337017
6th	M	0.0133543	0.0509224	0.262248
6th	M	0.0548683	0.0672025	0.816462
6th	M	0.0261584	0.0686398	0.381098
6th	M	0.021848	0.0704312	0.310204
6th	M	0.0237821	0.0650641	0.365517
6th	M	0.053224	0.0971612	0.54779
6th	M	0.0145782	0.0714252	0.204105
6th	M	0.0147101	0.0352029	0.417867
6th	M	0.0408718	0.0520513	0.785222
6th	M	0.0356692	0.0610391	0.584366
6th	M	0.0132432	0.0662162	0.2
6th	F	0.0148485	0.0383066	0.387622
6th	F	0.0435305	0.0721326	0.603478
6th	F	0.0237595	0.0625419	0.379898
6th	F	0.0276836	0.0514124	0.538462
6th	F	0.0298938	0.0416574	0.717611
6th	F	0.0316647	0.0752352	0.420875
6th	F	0.0110013	0.0209379	0.525424
6th	F	0.0521062	0.0611639	0.851911
6th	F	0.0382882	0.0884327	0.432964
6th	F	0.036285	0.062341	0.582041
6th	F	0.0730457	0.0806884	0.905281
