# Supplementary material for: Body mass and growth rates predict protein intake across animals
Source: eLife. 2024 Nov 11;13:e88933. doi: 10.7554/eLife.88933 (PMC11587531; doi:10.7554/eLife.88933)
Supplement: Figure 2—source data 1. [file elife-88933-fig2-data1.xlsx]

## Sheet: Sheet1
Figure 2 - Source Data 1
Instar	Sex	Mass Specific Protein consumption rate (g/g/d)	Mass Specific carb consumption rate (g/g/d)	Specific growth rate
1st	F	0.100985	0.0636172	0.124		Consumption rates were corrected by initial mass
1st	M	0.107518	0.0992908	0.144
1st	M	0.166596	0.176525	0.158
1st	F	0.0979592	0.0842365	0.139
1st	F	0.103519	0.0539057	0.111
1st	F	0.0897959	0.0794511	0.111
1st	F	0.104504	0.0646728	0.121
1st	F	0.109711	0.0767065	0.146
1st	F	0.130471	0.118367	0.154
1st	F	0.0927516	0.0901478	0.164
1st	M	0.0941844	0.084539	0.134
1st	M	0.155035	0.0795745	0.188
1st	F	0.0980296	0.0999296	0.159
1st	M	0.0716312	0.0574468	0.086
1st	F	0.145109	0.144828	0.186
1st	F	0.095848	0.0914145	0.123
1st	M	0.0883688	0.0807092	0.15
1st	M	0.0904255	0.0658156	0.127
1st	M	0.0821986	0.0868794	0.113
1st	F	0.100844	0.0908515	0.158
1st	M	0.0738298	0.075461	0.132
1st	F	0.0997889	0.0670654	0.123
1st	M	0.0822695	0.0694326	0.148
1st	M	0.087234	0.0530496	0.101
1st	F	0.108234	0.0627023	0.153
1st	M	0.0843262	0.0635461	0.079
1st	F	0.107741	0.066221	0.12
1st	M	0.087234	0.0871631	0.158
1st	F	0.0840253	0.0594652	0.142
1st	M	0.107801	0.0629078	0.093
1st	M	0.087234	0.0966667	0.089
1st	M	0.10773	0.102908	0.173
1st	F	0.0812104	0.0825475	0.128
1st	M	0.0673759	0.051773	0.142
1st	M	0.0804965	0.0731206	0.115
1st	M	0.081773	0.0707801	0.109
1st	M	0.081844	0.0807801	0.152
1st	F	0.0898663	0.0831809	0.137
1st	M	0.0812057	0.0741844	0.144
1st	F	0.16235	0.142576	0.175
1st	M	0.0815603	0.058227	0.136
1st	M	0.0928369	0.0601418	0.101
1st	F	0.096411	0.0877551	0.101
1st	F	0.0951443	0.0904996	0.115
1st	F	0.12076	0.117734	0.098
1st	F	0.133357	0.0622097	0.198
1st	M	0.118298	0.0919149	0.144
1st	M	0.0971631	0.0616312	0.107
1st	M	0.0951773	0.0882979	0.188
1st	F	0.115412	0.0598874	0.136
1st	M	0.100496	0.0691489	0.14
1st	M	0.0868085	0.0692908	0.108
1st	F	0.0823364	0.0729768	0.108
1st	F	0.123293	0.105841	0.17
1st	F	0.117171	0.100704	0.181
1st	M	0.103262	0.0979433	0.087
1st	F	0.098311	0.0719916	0.119
1st	M	0.0946809	0.0717021	0.143
1st	F	0.0939479	0.0558761	0.096
1st	F	0.102885	0.0809993	0.139
1st	F	0.107741	0.0955665	0.184
1st	F	0.100704	0.0904293	0.181
1st	F	0.121182	0.0655876	0.115
1st	F	0.0945813	0.0863476	0.151
1st	M	0.098227	0.0904965	0.129
1st	F	0.0830401	0.0668543	0.13
1st	M	0.0930496	0.0865957	0.146
1st	F	0.138916	0.0909219	0.169
1st	F	0.127727	0.106474	0.168
1st	M	0.149291	0.131702	0.126
1st	F	0.125897	0.0898663	0.188
1st	M	0.0938298	0.09	0.163
1st	M	0.115319	0.0729787	0.079
1st	F	0.0726953	0.0868403	0.15
1st	F	0.0712878	0.0841661	0.123
1st	M	0.0424823	0.077234	0.091
1st	F	0.104011	0.0716397	0.129
1st	M	0.0867376	0.0548227	0.18
2nd	M	0.121279	0.0804789	0.148
2nd	F	0.139077	0.144	0.161
2nd	M	0.0765383	0.0640194	0.13
2nd	F	0.0672923	0.0831385	0.113
2nd	F	0.0706769	0.0949231	0.102
2nd	M	0.0918157	0.0925432	0.113
2nd	F	0.101569	0.0816923	0.111
2nd	F	0.0647077	0.0724923	0.133
2nd	M	0.144074	0.115247	0.124
2nd	M	0.142195	0.132919	0.129
2nd	F	0.166677	0.124338	0.141
2nd	F	0.0776	0.0843692	0.08
2nd	F	0.195446	0.119385	0.159
2nd	F	0.127415	0.132585	0.167
2nd	F	0.122677	0.122062	0.147
2nd	M	0.0925129	0.0975447	0.139
2nd	M	0.058442	0.0648985	0.098
2nd	F	0.0888615	0.0890154	0.145
2nd	M	0.0846923	0.0879357	0.078
2nd	F	0.0995077	0.0904308	0.148
2nd	M	0.0878145	0.0776296	0.1
2nd	F	0.0644	0.0753846	0.107
2nd	M	0.0753562	0.0785086	0.075
2nd	F	0.0718154	0.0779077	0.123
2nd	F	0.0925846	0.0964308	0.135
2nd	F	0.113508	0.108923	0.119
2nd	F	0.150092	0.0879077	0.187
2nd	F	0.0872923	0.0716	0.105
2nd	M	0.0918157	0.091846	0.114
2nd	F	0.122862	0.0968615	0.134
2nd	M	0.156441	0.0994544	0.135
2nd	F	0.195846	0.126554	0.138
2nd	M	0.100727	0.0917551	0.115
2nd	M	0.173962	0.0802061	0.135
2nd	M	0.0708093	0.0694756	0.109
2nd	F	0.0865231	0.0871692	0.147
2nd	M	0.124038	0.0912701	0.104
2nd	F	0.104154	0.107415	0.102
2nd	F	0.111354	0.0857846	0.131
2nd	F	0.109662	0.0978462	0.146
2nd	F	0.147662	0.1408	0.1
2nd	F	0.222554	0.164892	0.13
2nd	F	0.0822769	0.100677	0.157
2nd	M	0.0830555	0.0976356	0.101
2nd	F	0.113908	0.1144	0.123
2nd	M	0.0795089	0.0751137	0.095
2nd	M	0.11164	0.125553	0.104
2nd	M	0.0826614	0.0842983	0.095
2nd	M	0.0810852	0.0726887	0.101
2nd	F	0.0895077	0.0749846	0.107
2nd	M	0.0849651	0.0964838	0.082
2nd	M	0.0870264	0.085632	0.096
2nd	F	0.0794769	0.0972923	0.119
2nd	M	0.103062	0.10585	0.071
2nd	F	0.0785538	0.0777538	0.136
2nd	F	0.0744308	0.0617538	0.103
2nd	M	0.0696272	0.0802364	0.074
2nd	F	0.134462	0.124923	0.175
2nd	F	0.0856	0.0823385	0.132
2nd	M	0.0832677	0.064656	0.115
2nd	M	0.0763262	0.0669294	0.11
2nd	F	0.116215	0.0740615	0.155
2nd	M	0.079418	0.0926038	0.11
2nd	F	0.153385	0.102738	0.165
2nd	F	0.104246	0.0922769	0.175
2nd	F	0.140462	0.121415	0.197
2nd	F	0.0783385	0.0775385	0.103
2nd	F	0.113108	0.0856	0.126
2nd	M	0.0881479	0.0763868	0.053
2nd	F	0.128831	0.105231	0.104
2nd	M	0.0851167	0.0668384	0.09
2nd	F	0.0735385	0.104154	0.117
2nd	M	0.0719612	0.0651713	0.118
2nd	M	0.0919673	0.0592907	0.1
2nd	M	0.0814792	0.0858745	0.116
2nd	M	0.0983328	0.0659897	0.124
2nd	F	0.101108	0.0792308	0.121
2nd	M	0.112701	0.101546	0.109
2nd	M	0.0963322	0.0594726	0.117
2nd	M	0.111155	0.115277	0.1
2nd	M	0.161049	0.110579	0.141
2nd	M	0.0953925	0.0697484	0.113
2nd	M	0.0863898	0.0747802	0.098
2nd	F	0.0974769	0.105262	0.154
2nd	M	0.0966353	0.10191	0.116
2nd	M	0.0850864	0.082722	0.107
2nd	F	0.137169	0.113815	0.113
2nd	M	0.105517	0.0854198	0.111
2nd	M	0.111185	0.0831161	0.123
2nd	M	0.143498	0.0916035	0.118
2nd	F	0.0900308	0.0825231	0.113
2nd	F	0.0952923	0.0850462	0.144
2nd	F	0.0956	0.0935385	0.103
2nd	F	0.111815	0.0835385	0.114
2nd	F	0.0812	0.0660615	0.09
2nd	F	0.0848308	0.0726769	0.142
2nd	M	0.105062	0.101	0.095
3rd	M	0.0667144	0.0379064	0.084
3rd	M	0.0686158	0.0436618	0.08
3rd	F	0.0857786	0.049697	0.071
3rd	F	0.0842453	0.0823999	0.073
3rd	F	0.0743757	0.0341076	0.095
3rd	M	0.0631262	0.0345533	0.097
3rd	F	0.0854389	0.0596126	0.083
3rd	F	0.0663882	0.0527635	0.098
3rd	M	0.0580863	0.0439583	0.085
3rd	F	0.0759273	0.0452075	0.071
3rd	M	0.0661828	0.0732161	0.083
3rd	M	0.0882028	0.0584339	0.086
3rd	M	0.0879268	0.0290022	0.099
3rd	F	0.0985586	0.0423889	0.085
3rd	F	0.0478241	0.0558391	0.064
3rd	M	0.0717134	0.0632488	0.068
3rd	F	0.0818582	0.0701983	0.081
3rd	M	0.0924453	0.0278471	0.082
3rd	F	0.0602277	0.0573173	0.075
3rd	M	0.0875383	0.040411	0.082
3rd	F	0.0807749	0.0488524	0.095
3rd	M	0.0574013	0.0514414	0.073
3rd	F	0.0874587	0.04731	0.099
3rd	F	0.070134	0.0409199	0.086
3rd	M	0.0693212	0.0486097	0.05
3rd	F	0.0938946	0.0522494	0.085
3rd	F	0.0656078	0.0568215	0.087
3rd	F	0.0562339	0.0320694	0.072
3rd	F	0.0633125	0.0307106	0.063
3rd	M	0.059589	0.0401656	0.054
3rd	M	0.0629115	0.0585259	0.075
3rd	M	0.100562	0.023165	0.119
3rd	F	0.0788836	0.0828773	0.041
3rd	F	0.0442986	0.0604572	0.077
3rd	M	0.0612656	0.0487937	0.089
3rd	F	0.0700606	0.0299394	0.083
3rd	F	0.0693445	0.0798843	0.056
3rd	M	0.0473523	0.0554079	0.056
3rd	F	0.0835751	0.0733658	0.086
3rd	M	0.0691167	0.0352893	0.089
3rd	M	0.0661317	0.0487221	0.097
3rd	F	0.063542	0.0475119	0.101
3rd	F	0.0722273	0.0611274	0.058
3rd	F	0.0605582	0.0380279	0.07
3rd	M	0.0648334	0.0427929	0.057
3rd	F	0.0508538	0.0514598	0.084
3rd	F	0.0449963	0.0424715	0.093
3rd	M	0.0517583	0.0326825	0.077
3rd	F	0.0689772	0.0662413	0.12
3rd	M	0.0490902	0.0442956	0.067
3rd	M	0.0450215	0.0382028	0.078
3rd	M	0.0590063	0.0393273	0.087
3rd	M	0.0845328	0.0698937	0.14
3rd	F	0.0667003	0.0259089	0.091
3rd	M	0.064128	0.0367001	0.062
3rd	M	0.0439276	0.0435187	0.007
3rd	M	0.0722858	0.0480781	0.092
3rd	F	0.0454921	0.033621	0.061
3rd	F	0.0706941	0.0366967	0.066
3rd	M	0.0523206	0.0403496	0.077
3rd	M	0.0460846	0.029769	0.062
3rd	M	0.0662543	0.0450215	0.082
3rd	F	0.0605949	0.0338138	0.078
3rd	F	0.0596768	0.0569684	0.046
3rd	M	0.0586076	0.0168166	0.058
3rd	M	0.0593846	0.0175424	0.107
3rd	F	0.0616875	0.0572714	0.072
3rd	F	0.081491	0.0473008	0.079
3rd	F	0.0591994	0.0584741	0.071
3rd	F	0.074238	0.0220988	0.067
3rd	M	0.0795747	0.0436516	0.073
3rd	M	0.0592312	0.0364445	0.084
3rd	M	0.0635248	0.0407381	0.086
3rd	F	0.044877	0.0398274	0.035
3rd	M	0.0596708	0.0460233	0.072
3rd	M	0.0483848	0.0384891	0.079
3rd	F	0.0763588	0.058924	0.069
3rd	F	0.074495	0.0399651	0.087
3rd	F	0.0786357	0.0405252	0.075
3rd	M	0.0312206	0.0356164	0.065
3rd	M	0.0561235	0.0341852	0.072
3rd	F	0.0487881	0.0298109	0.071
3rd	M	0.0410959	0.045778	0.042
3rd	F	0.0802148	0.0285898	0.073
3rd	M	0.0525659	0.0278062	0.058
3rd	M	0.0677878	0.0478532	0.092
3rd	F	0.0458869	0.0417738	0.1
3rd	F	0.0476313	0.0407363	0.091
3rd	F	0.0637073	0.0702259	0.077
3rd	M	0.0371805	0.047843	0.047
3rd	M	0.0575649	0.05642	0.066
3rd	M	0.0523513	0.0434063	0.094
3rd	M	0.0627172	0.037753	0.083
3rd	F	0.0455472	0.0496328	0.081
3rd	M	0.0402167	0.0460846	0.06
3rd	M	0.0345839	0.0354733	0.092
3rd	M	0.0573093	0.0501022	0.054
3rd	F	0.0519647	0.02343	0.056
4th	F	0.0942251	0.0555178	0.057
4th	M	0.0721181	0.108185	0.146
4th	F	0.0660557	0.0423602	0.086
4th	F	0.0618286	0.0406932	0.074
4th	F	0.043636	0.0583798	0.091
4th	F	0.0619264	0.0759898	0.118
4th	F	0.0710908	0.0437253	0.095
4th	M	0.0589064	0.0631866	0.096
4th	M	0.0567412	0.0744387	0.1
4th	M	0.0637229	0.0493534	0.096
4th	M	0.0601644	0.0676474	0.106
4th	F	0.0454476	0.0456134	0.064
4th	M	0.0669256	0.0447474	0.09
4th	F	0.0856985	0.0446268	0.101
4th	F	0.0700957	0.0407017	0.091
4th	F	0.0792303	0.0594642	0.111
4th	M	0.0950632	0.0756616	0.178
4th	F	0.0557261	0.0573336	0.092
4th	F	0.055909	0.0507804	0.107
4th	M	0.0543555	0.063352	0.101
4th	M	0.0743835	0.0507267	0.091
4th	F	0.0709972	0.0487604	0.089
4th	M	0.069582	0.0373897	0.097
4th	F	0.0628663	0.0821943	0.085
4th	F	0.0643929	0.0649798	0.105
4th	F	0.0791792	0.0492707	0.096
4th	M	0.0486167	0.0480754	0.078
4th	F	0.0517117	0.0878418	0.112
4th	M	0.0582999	0.0294457	0.066
4th	M	0.0642843	0.0576333	0.137
4th	F	0.0593238	0.0766277	0.135
4th	M	0.0744687	0.0456295	0.08
4th	F	0.0653285	0.0794387	0.107
4th	F	0.0603275	0.0700617	0.101
4th	F	0.0745099	0.0590899	0.104
4th	M	0.059182	0.0701032	0.099
4th	M	0.0538292	0.0474589	0.077
4th	M	0.0633821	0.0541901	0.077
4th	M	0.0903117	0.0393244	0.14
4th	M	0.0478498	0.0876453	0.083
4th	F	0.0634276	0.0649628	0.107
4th	M	0.075005	0.0521752	0.081
4th	F	0.0880629	0.0450308	0.103
4th	F	0.0731448	0.0656942	0.12
4th	F	0.0796768	0.0779502	0.128
4th	M	0.0579641	0.0730403	0.095
4th	M	0.0514735	0.0642692	0.087
4th	F	0.0579417	0.0575292	0.115
4th	M	0.0652817	0.0407779	0.053
4th	M	0.0639886	0.0582448	0.096
4th	M	0.0626554	0.0693665	0.085
4th	M	0.0718474	0.0848737	0.16
4th	M	0.0370589	0.0674218	0.063
4th	F	0.0856815	0.0290453	0.112
4th	M	0.0557939	0.0592121	0.033
4th	M	0.0512881	0.0547715	0.074
4th	M	0.0653919	0.0427727	0.095
4th	M	0.0517091	0.0368083	0.035
4th	F	0.0570615	0.0441803	0.091
4th	M	0.0584954	0.0585455	0.098
4th	F	0.0712651	0.0487604	0.112
4th	M	0.0671111	0.0498246	0.079
4th	M	0.0843474	0.0578488	0.1
4th	M	0.0457598	0.0688252	0.09
4th	F	0.0693812	0.0333787	0.114
4th	M	0.0588613	0.0554431	0.078
4th	M	0.0713913	0.0528418	0.117
4th	F	0.0636402	0.0431384	0.067
4th	M	0.0567512	0.0349238	0.081
4th	F	0.0423942	0.0680162	0.063
4th	M	0.0672163	0.0399659	0.098
4th	F	0.0730853	0.0539358	0.086
4th	M	0.0642342	0.0649108	0.096
4th	M	0.0571221	0.0638833	0.053
4th	M	0.0667201	0.0485666	0.078
4th	F	0.0666851	0.0399149	0.109
4th	M	0.0855904	0.0393494	0.089
4th	M	0.0578538	0.0724489	0.078
4th	M	0.0481506	0.0639435	0.096
4th	F	0.0801999	0.0517627	0.118
4th	M	0.0831045	0.0750551	0.076
4th	F	0.0596428	0.0837508	0.097
4th	M	0.0547013	0.0502356	0.086
4th	M	0.0555132	0.0216018	0.048
4th	M	0.063733	0.0750301	0.083
4th	F	0.0766404	0.0762237	0.104
4th	M	0.0585505	0.0564204	0.089
4th	F	0.0728641	0.0692494	0.117
4th	M	0.0525912	0.0530122	0.094
4th	M	0.0632167	0.0818565	0.102
4th	M	0.0715968	0.0423567	0.113
4th	F	0.0547735	0.065252	0.099
4th	M	0.0834152	0.0610315	0.101
4th	M	0.072494	0.0437751	0.122
4th	M	0.063753	0.0437099	0.098
4th	F	0.0641761	0.0567723	0.106
4th	M	0.0626253	0.0478899	0.113
4th	M	0.0769497	0.0698426	0.103
5th	M	0.0648385	0.057311	0.103
5th	M	0.0473039	0.0725412	0.108
5th	M	0.084527	0.101333	0.135
5th	M	0.0974959	0.0650813	0.134
5th	F	0.0472879	0.0479563	0.039
5th	M	0.0889514	0.0893877	0.128
5th	F	0.0766658	0.0757558	0.119
5th	M	0.0672044	0.0929579	0.131
5th	F	0.0420746	0.0468766	0.049
5th	M	0.0591268	0.0717424	0.108
5th	M	0.0891419	0.0552585	0.133
5th	M	0.0365072	0.0251206	0.031
5th	M	0.0780471	0.0722524	0.12
5th	M	0.0614312	0.0811073	0.083
5th	F	0.0466992	0.0655887	0.044
5th	M	0.0706763	0.102224	0.128
5th	F	0.0641465	0.0801003	0.11
5th	F	0.0457532	0.0741825	0.033
5th	F	0.0729434	0.0634987	0.124
5th	M	0.064009	0.0830829	0.122
5th	F	0.060617	0.101661	0.112
5th	F	0.0560874	0.0886684	0.125
5th	M	0.0531785	0.0774326	0.103
5th	M	0.0520294	0.0550035	0.099
5th	M	0.0848066	0.0517037	0.13
5th	M	0.0715888	0.0819553	0.104
5th	M	0.0761053	0.0495099	0.11
5th	M	0.0650444	0.0651612	0.098
5th	M	0.0592098	0.0688942	0.077
5th	M	0.0767137	0.0936983	0.113
5th	M	0.067699	0.0651058	0.115
5th	M	0.0604203	0.0556088	0.112
5th	F	0.0635244	0.0652982	0.11
5th	F	0.0709769	0.0697224	0.119
5th	F	0.0774859	0.0600668	0.111
5th	F	0.0650874	0.091144	0.115
5th	F	0.0926272	0.0744319	0.145
5th	M	0.0658217	0.107337	0.132
5th	M	0.0539067	0.0627124	0.061
5th	F	0.0528946	0.0842725	0.083
5th	M	0.0460534	0.079525	0.096
5th	M	0.0605432	0.102642	0.125
5th	M	0.0683719	0.0673088	0.103
5th	M	0.0565121	0.0683657	0.07
5th	F	0.0523316	0.0682699	0.021
5th	M	0.0467355	0.078677	0.108
5th	M	0.0554583	0.043537	0.096
5th	M	0.0641841	0.0614312	0.097
5th	M	0.0695302	0.088088	0.099
5th	F	0.0556221	0.0511902	0.084
5th	F	0.0634396	0.109897	0.13
5th	M	0.077362	0.105346	0.141
5th	F	0.0394242	0.0826735	0.082
5th	M	0.0445632	0.113977	0.104
5th	M	0.0495929	0.0427474	0.078
5th	M	0.0744861	0.0748917	0.115
5th	M	0.0960519	0.0771991	0.143
5th	M	0.0565674	0.0713522	0.09
5th	F	0.0702237	0.0621311	0.098
5th	F	0.0933779	0.0859743	0.137
5th	F	0.0765861	0.0750643	0.123
5th	M	0.0905736	0.0930193	0.143
5th	F	0.0629486	0.0592571	0.116
5th	M	0.0726303	0.044597	0.054
5th	M	0.0681445	0.0566043	0.095
5th	M	0.0544198	0.0770578	0.075
5th	M	0.0296402	0.0187145	0.076
5th	M	0.0769226	0.0353089	0.106
5th	F	0.0821414	0.0539769	0.12
5th	M	0.0797124	0.100654	0.14
5th	F	0.0574422	0.0623882	0.1
5th	F	0.0493728	0.115758	0.11
5th	F	0.112244	0.132244	0.155
5th	M	0.0545457	0.0666267	0.102
5th	M	0.0738532	0.0447384	0.088
5th	M	0.0240237	0.0363505	0.048
5th	M	0.0814822	0.0835469	0.125
5th	M	0.0895198	0.0567794	0.136
5th	F	0.0721594	0.0572494	0.076
5th	F	0.0767841	0.0742031	0.134
5th	F	0.0813779	0.0839075	0.143
5th	F	0.0590206	0.112111	0.126
5th	M	0.0915077	0.044597	0.144
5th	M	0.0683135	0.050444	0.109
5th	F	0.0491028	0.0699871	0.085
5th	M	0.059812	0.0456908	0.084
5th	M	0.0537438	0.0421176	0.083
5th	F	0.0530488	0.0562159	0.12
5th	F	0.0498715	0.0536555	0.093
5th	F	0.0311697	0.0734216	0.077
6th	M	0.0357942	0.086	0.055
6th	M	0.036182	0.0580846	0.035
6th	M	0.053464	0.0674209	0.068
6th	F	0.0572853	0.0661544	0.066
6th	F	0.0444524	0.0683378	0.047
6th	M	0.059921	0.0546407	0.045
6th	M	0.048778	0.0658134	0.055
6th	M	0.0367733	0.0582777	0.016
6th	M	0.065378	0.0700611	0.063
6th	M	0.0239841	0.0470397	0.066
6th	M	0.0516454	0.0726388	0.06
6th	M	0.0436166	0.0596951	0.063
6th	F	0.0313009	0.077567	0.047
6th	F	0.0374042	0.0758472	0.051
6th	F	0.055859	0.0502371	0.062
6th	F	0.0549652	0.0553147	0.07
6th	F	0.0425091	0.0738706	0.066
6th	F	0.0593249	0.0746598	0.066
6th	F	0.0656849	0.065799	0.079
6th	F	0.0416307	0.0764605	0.052
6th	F	0.0601212	0.0542568	0.073
6th	F	0.0570559	0.0509134	0.076
6th	M	0.0450651	0.0531	0.052
6th	M	0.0601854	0.0623992	0.07
6th	M	0.0341124	0.0403643	0.034
6th	M	0.0340024	0.0922073	0.046
6th	F	0.0299126	0.0666465	0.08
6th	F	0.0561752	0.0428419	0.058
6th	F	0.0505818	0.070999	0.07
6th	M	0.0675517	0.101917	0.095
6th	M	0.0469743	0.0484511	0.053
6th	M	0.0439553	0.0731499	0.046
6th	F	0.034453	0.0557497	0.05
6th	M	0.037736	0.0737353	0.074
6th	F	0.0261746	0.0595733	0.022
6th	F	0.0175848	0.0431509	0.08
6th	F	0.0438141	0.0599239	0.077
6th	M	0.0510066	0.0520852	0.058
6th	F	0.0623141	0.0566661	0.064
6th	M	0.061793	0.0734144	0.052
6th	F	0.0447816	0.0463767	0.042
6th	F	0.0273703	0.0691318	0.056
6th	M	0.0331258	0.0480663	0.023
6th	F	0.0632365	0.0590812	0.082
6th	M	0.0516142	0.046016	0.059
6th	F	0.0480549	0.076136	0.073
6th	M	0.0321764	0.0647526	0.032
6th	M	0.0327232	0.0358165	0.027
6th	M	0.0548472	0.063928	0.068
6th	M	0.0497645	0.0720475	0.061
6th	M	0.0477707	0.0553271	0.056
6th	M	0.0534892	0.0505415	0.041
6th	M	0.0423032	0.047423	0.066
6th	M	0.0662784	0.0772253	0.061
Adult	F	0.0171744	0.0328936	0.01
Adult	F	0.0128746	0.0357736	N/A
Adult	F	0.0209445	0.0575865	0.021
Adult	M	0.0140904	0.0349733	0.005
Adult	M	0.0163974	0.0449663	0.01
Adult	M	0.0137001	0.042893	0.004
Adult	F	0.0184254	0.0491	0.016
Adult	F	0.0207316	0.0480607	0.017
Adult	M	0.02305	0.0541729	0.016
Adult	M	0.0191001	0.0463482	0.007
Adult	M	0.0135938	0.0439918	0.008
Adult	F	0.0093116	0.0309071	N/A
Adult	M	0.014514	0.047763	0.01
Adult	M	0.0153301	0.0418009	0.007
Adult	M	0.0151679	0.0529341	0.015
Adult	F	0.0182975	0.0375668	0.006
Adult	M	0.0263373	0.0530616	0.016
Adult	M	0.0197775	0.051943	0.011
Adult	F	0.0151073	0.0351056	0.004
Adult	F	0.0234169	0.0469906	0.01
Adult	F	0.0161842	0.0354788	0.015
Adult	M	0.0212327	0.0563479	0.013
Adult	M	0.021034	0.0475054	0.012
Adult	F	0.0175958	0.0414984	0.01
Adult	F	0.0129635	0.037103	0.003
Adult	M	0.0217872	0.0458777	0.011
Adult	M	0.0149907	0.0354711	0.001
Adult	F	0.0110138	0.040448	0.008
Adult	F	0.0204582	0.0442729	0.01
Adult	F	0.0171477	0.0434018	0.008
Adult	M	0.0135136	0.0458825	0.005
Adult	F	0.0121396	0.0391729	0.003
Adult	F	0.0114954	0.0326171	0.003
Adult	F	0.0244192	0.0443023	0.008
Adult	M	0.0159581	0.0509443	0.01
Adult	M	0.0172906	0.0521512	0.013
Adult	F	0.0146676	0.0422822	0.007
Adult	M	0.0223124	0.0545836	0.016
Adult	M	0.0120523	0.042163	0.003
Adult	M	0.0196786	0.0428675	0.005
Adult	M	0.0292984	0.0444513	0.005
Adult	F	0.00984206	0.0325385	N/A
Adult	M	0.0190095	0.0435269	0.013
Adult	M	0.0175737	0.0449132	0.011
Adult	F	0.0137393	0.0377139	0.004
Adult	F	0.0179174	0.0472227	0.014
Adult	M	0.0153607	0.0317651	N/A
Adult	F	0.015474	0.0430915	0.012
Adult	M	0.0251254	0.0501206	0.014
Adult	M	0.0116565	0.0354764	N/A
Adult	M	0.0155645	0.0602638	0.012
Adult	F	0.0122973	0.0292409	0.002
Adult	F	0.0130792	0.0438851	0.005
