# Supplementary material for: Body mass and growth rates predict protein intake across animals
Source: eLife. 2024 Nov 11;13:e88933. doi: 10.7554/eLife.88933 (PMC11587531; doi:10.7554/eLife.88933)
Supplement: Figure 3—source data 1. [file elife-88933-fig3-data1.xlsx]

## Sheet: Raw data - Nutritional consumpt
Figure 3- Source Data 1
Instar	Sex	Protein consumption rate (Log10 /(gram))	Carb consumption rate (Log10 /(gram))	End Mass (Log10 /(gram))
1st	F	-2.84315	-3.04383	-1.57741
1st	M	-2.8193	-2.85387	-1.5382
1st	M	-2.62912	-2.60398	-1.50822
1st	F	-2.85636	-2.92191	-1.54653
1st	F	-2.83239	-3.11577	-1.6073
1st	F	-2.89415	-2.94731	-1.60555
1st	F	-2.82827	-3.03668	-1.58403
1st	F	-2.80715	-2.96257	-1.53077
1st	F	-2.73189	-2.77417	-1.51399
1st	F	-2.88008	-2.89245	-1.49174
1st	M	-2.8768	-2.92372	-1.55972
1st	M	-2.66035	-2.95001	-1.44309
1st	F	-2.85605	-2.84771	-1.50114
1st	M	-2.99568	-3.09151	-1.66394
1st	F	-2.68571	-2.68655	-1.4437
1st	F	-2.86582	-2.88639	-1.58004
1st	M	-2.90448	-2.94386	-1.52404
1st	M	-2.89449	-3.03245	-1.57496
1st	M	-2.93592	-2.91186	-1.60467
1st	F	-2.84375	-2.88907	-1.50543
1st	M	-2.98255	-2.97306	-1.564
1st	F	-2.84832	-3.02091	-1.58037
1st	M	-2.93554	-3.00922	-1.53033
1st	M	-2.91009	-3.1261	-1.6306
1st	F	-2.81304	-3.05012	-1.51627
1st	M	-2.92482	-3.04769	-1.67819
1st	F	-2.81502	-3.02641	-1.58737
1st	M	-2.91009	-2.91045	-1.50836
1st	F	-2.923	-3.07314	-1.5397
1st	M	-2.81816	-3.05208	-1.64917
1st	M	-2.91009	-2.8655	-1.65699
1st	M	-2.81844	-2.83833	-1.47496
1st	F	-2.93779	-2.9307	-1.57057
1st	M	-3.02228	-3.13668	-1.54272
1st	M	-2.945	-2.98674	-1.60085
1st	M	-2.93817	-3.00087	-1.61475
1st	M	-2.93779	-2.94348	-1.52143
1st	F	-2.89381	-2.92738	-1.55021
1st	M	-2.94119	-2.98047	-1.5376
1st	F	-2.63695	-2.69336	-1.46661
1st	M	-2.9393	-3.08566	-1.55627
1st	M	-2.88306	-3.0716	-1.63116
1st	F	-2.86328	-2.90413	-1.62856
1st	F	-2.86902	-2.89076	-1.59774
1st	F	-2.76548	-2.7765	-1.63358
1st	F	-2.72239	-3.05355	-1.41646
1st	M	-2.7778	-2.88739	-1.5385
1st	M	-2.86328	-3.06098	-1.61744
1st	M	-2.87225	-2.90483	-1.44213
1st	F	-2.78516	-3.07007	-1.55238
1st	M	-2.84863	-3.011	-1.54607
1st	M	-2.91222	-3.01011	-1.61529
1st	F	-2.93181	-2.98422	-1.61297
1st	F	-2.75647	-2.82275	-1.47834
1st	F	-2.77859	-2.84436	-1.45333
1st	M	-2.83684	-2.85981	-1.66254
1st	F	-2.8548	-2.99012	-1.58905
1st	M	-2.87452	-2.99525	-1.54061
1st	F	-2.87452	-3.10018	-1.63827
1st	F	-2.83505	-2.93892	-1.54653
1st	F	-2.81502	-2.8671	-1.44758
1st	F	-2.84436	-2.8911	-1.4537
1st	F	-2.76397	-3.03058	-1.59774
1st	F	-2.8716	-2.91116	-1.51927
1st	M	-2.85855	-2.89415	-1.57025
1st	F	-2.92812	-3.02228	-1.56559
1st	M	-2.88207	-2.91328	-1.53313
1st	F	-2.70465	-2.88874	-1.47965
1st	F	-2.74112	-2.82016	-1.48294
1st	M	-2.67675	-2.73119	-1.57741
1st	F	-2.74739	-2.89381	-1.43914
1st	M	-2.87844	-2.89654	-1.49621
1st	M	-2.78888	-2.98758	-1.67965
1st	F	-2.9859	-2.90868	-1.52216
1st	F	-2.99439	-2.92227	-1.58054
1st	M	-3.22257	-2.96297	-1.65404
1st	F	-2.83033	-2.99225	-1.56799
1st	M	-2.91257	-3.11182	-1.4593
2nd	M	-2.39783	-2.57594	-1.09637
2nd	F	-2.34486	-2.32975	-1.06864
2nd	M	-2.59774	-2.67531	-1.14388
2nd	F	-2.66015	-2.56831	-1.19368
2nd	F	-2.63884	-2.51074	-1.22323
2nd	M	-2.5187	-2.51527	-1.18642
2nd	F	-2.48135	-2.57594	-1.19997
2nd	F	-2.67716	-2.62782	-1.142
2nd	M	-2.32303	-2.41999	-1.15927
2nd	M	-2.32873	-2.35803	-1.14418
2nd	F	-2.26624	-2.39351	-1.11993
2nd	F	-2.59825	-2.56193	-1.28083
2nd	F	-2.19709	-2.41117	-1.07391
2nd	F	-2.38289	-2.36562	-1.05399
2nd	F	-2.39935	-2.40154	-1.10502
2nd	M	-2.51542	-2.49241	-1.1185
2nd	M	-2.71489	-2.66938	-1.22519
2nd	F	-2.5394	-2.53865	-1.11075
2nd	M	-2.55377	-2.53745	-1.27728
2nd	F	-2.49026	-2.5318	-1.1021
2nd	M	-2.53805	-2.59159	-1.22113
2nd	F	-2.67923	-2.61083	-1.20915
2nd	M	-2.6045	-2.5867	-1.28559
2nd	F	-2.6319	-2.59654	-1.16698
2nd	F	-2.52158	-2.5039	-1.13739
2nd	F	-2.43309	-2.451	-1.17751
2nd	F	-2.31176	-2.54409	-1
2nd	F	-2.54714	-2.6332	-1.21439
2nd	M	-2.5187	-2.51856	-1.18489
2nd	F	-2.3987	-2.50197	-1.13835
2nd	M	-2.28727	-2.48399	-1.12925
2nd	F	-2.1962	-2.38584	-1.12819
2nd	M	-2.47847	-2.51899	-1.18323
2nd	M	-2.24116	-2.57741	-1.13077
2nd	M	-2.63153	-2.63979	-1.19812
2nd	F	-2.55098	-2.54775	-1.10408
2nd	M	-2.38806	-2.52129	-1.2107
2nd	F	-2.47044	-2.45705	-1.22185
2nd	F	-2.44141	-2.55471	-1.14758
2nd	F	-2.44806	-2.49757	-1.1069
2nd	F	-2.31885	-2.33951	-1.22658
2nd	F	-2.14068	-2.27092	-1.14997
2nd	F	-2.57284	-2.48519	-1.0779
2nd	M	-2.56225	-2.49201	-1.21796
2nd	F	-2.43156	-2.42969	-1.16736
2nd	M	-2.5812	-2.6059	-1.23284
2nd	M	-2.4338	-2.38279	-1.21084
2nd	M	-2.56431	-2.5558	-1.23455
2nd	M	-2.57268	-2.62015	-1.21954
2nd	F	-2.53626	-2.61314	-1.2081
2nd	M	-2.55238	-2.49716	-1.26793
2nd	M	-2.54197	-2.54898	-1.23188
2nd	F	-2.58788	-2.50004	-1.1777
2nd	M	-2.46852	-2.45693	-1.29628
2nd	F	-2.59295	-2.59739	-1.13277
2nd	F	-2.61636	-2.69745	-1.22004
2nd	M	-2.63884	-2.57725	-1.28836
2nd	F	-2.35952	-2.39147	-1.03133
2nd	F	-2.55564	-2.57251	-1.14503
2nd	M	-2.56114	-2.67101	-1.18197
2nd	M	-2.59894	-2.656	-1.19545
2nd	F	-2.42285	-2.61852	-1.08529
2nd	M	-2.5817	-2.51499	-1.19511
2nd	F	-2.30233	-2.47638	-1.05849
2nd	F	-2.47006	-2.52302	-1.03315
2nd	F	-2.34056	-2.40384	-0.975596
2nd	F	-2.59414	-2.5986	-1.22026
2nd	F	-2.43462	-2.55564	-1.15964
2nd	M	-2.53641	-2.5986	-1.34285
2nd	F	-2.3781	-2.46597	-1.21653
2nd	M	-2.5516	-2.65659	-1.24611
2nd	F	-2.6216	-2.47044	-1.1821
2nd	M	-2.62452	-2.66756	-1.17282
2nd	M	-2.51798	-2.70863	-1.22091
2nd	M	-2.57057	-2.54775	-1.17927
2nd	M	-2.48892	-2.66214	-1.15827
2nd	F	-2.48333	-2.58922	-1.1738
2nd	M	-2.42969	-2.47496	-1.19839
2nd	M	-2.49785	-2.7073	-1.17646
2nd	M	-2.43569	-2.41987	-1.22084
2nd	M	-2.27466	-2.43795	-1.11351
2nd	M	-2.5021	-2.63808	-1.18755
2nd	M	-2.54516	-2.60783	-1.22599
2nd	F	-2.49921	-2.46585	-1.0873
2nd	M	-2.49648	-2.4734	-1.17849
2nd	M	-2.55176	-2.564	-1.20398
2nd	F	-2.35086	-2.43192	-1.19396
2nd	M	-2.4583	-2.55006	-1.19328
2nd	M	-2.43557	-2.56193	-1.16172
2nd	M	-2.32477	-2.51971	-1.17367
2nd	F	-2.53373	-2.57154	-1.19464
2nd	F	-2.50906	-2.55846	-1.1121
2nd	F	-2.50766	-2.51713	-1.21968
2nd	F	-2.43962	-2.56623	-1.18977
2nd	F	-2.57856	-2.66817	-1.25267
2nd	F	-2.55956	-2.62672	-1.11862
2nd	M	-2.46017	-2.4773	-1.2353
3rd	M	-2.18535	-2.43086	-0.791854
3rd	M	-2.17315	-2.36947	-0.800848
3rd	F	-2.02951	-2.26656	-0.779056
3rd	F	-2.03735	-2.04697	-0.77237
3rd	F	-2.09146	-2.43004	-0.71654
3rd	M	-2.20936	-2.47108	-0.75721
3rd	F	-2.03124	-2.18755	-0.746783
3rd	F	-2.1408	-2.24056	-0.707478
3rd	M	-2.2455	-2.36653	-0.78744
3rd	F	-2.08249	-2.30768	-0.778038
3rd	M	-2.18883	-2.14497	-0.794525
3rd	M	-2.06409	-2.24291	-0.785925
3rd	M	-2.06545	-2.54714	-0.752248
3rd	F	-1.9692	-2.33564	-0.741602
3rd	F	-2.28325	-2.21595	-0.795961
3rd	M	-2.15397	-2.20852	-0.832299
3rd	F	-2.04983	-2.11657	-0.752788
3rd	M	-2.04369	-2.56479	-0.796641
3rd	F	-2.1831	-2.20461	-0.767258
3rd	M	-2.06737	-2.40307	-0.795256
3rd	F	-2.05562	-2.27401	-0.715456
3rd	M	-2.25065	-2.29826	-0.820362
3rd	F	-2.02109	-2.28794	-0.705534
3rd	F	-2.11696	-2.35096	-0.739929
3rd	M	-2.16871	-2.32285	-0.880216
3rd	F	-1.99025	-2.24481	-0.741578
3rd	F	-2.14594	-2.20838	-0.736956
3rd	F	-2.21289	-2.4568	-0.775156
3rd	F	-2.1614	-2.4756	-0.799478
3rd	M	-2.23441	-2.40572	-0.869956
3rd	M	-2.21084	-2.24222	-0.815167
3rd	M	-2.00714	-2.64474	-0.698449
3rd	F	-2.06591	-2.04446	-0.856985
3rd	F	-2.3165	-2.18144	-0.763261
3rd	M	-2.22236	-2.32121	-0.777518
3rd	F	-2.11742	-2.48665	-0.747681
3rd	F	-2.12188	-2.06043	-0.815706
3rd	M	-2.33423	-2.266	-0.863882
3rd	F	-2.04082	-2.0974	-0.740024
3rd	M	-2.16999	-2.46193	-0.776842
3rd	M	-2.18916	-2.32185	-0.756788
3rd	F	-2.15983	-2.28609	-0.700384
3rd	F	-2.10419	-2.17666	-0.811887
3rd	F	-2.18072	-2.38279	-0.781464
3rd	M	-2.19777	-2.3782	-0.859743
3rd	F	-2.25657	-2.25142	-0.742922
3rd	F	-2.30972	-2.33479	-0.720037
3rd	M	-2.29559	-2.49526	-0.809388
3rd	F	-2.12419	-2.14176	-0.649655
3rd	M	-2.31858	-2.36321	-0.834934
3rd	M	-2.35615	-2.42748	-0.805735
3rd	M	-2.23867	-2.41488	-0.782779
3rd	M	-2.08255	-2.16513	-0.645815
3rd	F	-2.13876	-2.54944	-0.724481
3rd	M	-2.20252	-2.44491	-0.849121
3rd	M	-2.36683	-2.3709	-0.992423
3rd	M	-2.15052	-2.32763	-0.769296
3rd	F	-2.30496	-2.43628	-0.802775
3rd	F	-2.11351	-2.39827	-0.789815
3rd	M	-2.2909	-2.40373	-0.808661
3rd	M	-2.34602	-2.53581	-0.849244
3rd	M	-2.18836	-2.35615	-0.795527
3rd	F	-2.18046	-2.4338	-0.759326
3rd	F	-2.18709	-2.20726	-0.843966
3rd	M	-2.24162	-2.78383	-0.859523
3rd	M	-2.2359	-2.76548	-0.730767
3rd	F	-2.1727	-2.20495	-0.775389
3rd	F	-2.05178	-2.28802	-0.757757
3rd	F	-2.19057	-2.19593	-0.777934
3rd	F	-2.09227	-2.61852	-0.788586
3rd	M	-2.1088	-2.36957	-0.819845
3rd	M	-2.23702	-2.44794	-0.789655
3rd	M	-2.20663	-2.39957	-0.784442
3rd	F	-2.31087	-2.36271	-0.871956
3rd	M	-2.23381	-2.34659	-0.822752
3rd	M	-2.32486	-2.42424	-0.803299
3rd	F	-2.08003	-2.1926	-0.78394
3rd	F	-2.09076	-2.36121	-0.735796
3rd	F	-2.06727	-2.35517	-0.768097
3rd	M	-2.51513	-2.45792	-0.840704
3rd	M	-2.26043	-2.47573	-0.822377
3rd	F	-2.27458	-2.48852	-0.779108
3rd	M	-2.39577	-2.34892	-0.899457
3rd	F	-2.05864	-2.50668	-0.771651
3rd	M	-2.28887	-2.56543	-0.857767
3rd	M	-2.17842	-2.32966	-0.770011
3rd	F	-2.3012	-2.34199	-0.703225
3rd	F	-2.285	-2.35291	-0.726466
3rd	F	-2.1587	-2.1164	-0.76213
3rd	M	-2.43926	-2.32975	-0.886224
3rd	M	-2.24941	-2.25814	-0.838093
3rd	M	-2.29065	-2.37202	-0.763967
3rd	M	-2.21219	-2.43262	-0.792716
3rd	F	-2.30443	-2.26712	-0.751683
3rd	M	-2.40517	-2.34602	-0.852015
3rd	M	-2.4707	-2.45967	-0.769117
3rd	M	-2.25135	-2.30972	-0.870117
3rd	F	-2.24718	-2.59312	-0.818156
4th	F	-1.98873	-2.21846	-0.813185
4th	M	-1.84197	-1.66585	-0.319674
4th	F	-1.80874	-2.0017	-0.40553
4th	F	-1.83747	-2.01913	-0.436519
4th	F	-1.98881	-1.86239	-0.390331
4th	F	-1.83678	-1.7479	-0.319891
4th	F	-1.77684	-1.98792	-0.38026
4th	M	-1.92985	-1.89939	-0.448574
4th	M	-1.94612	-1.82822	-0.440165
4th	M	-1.89572	-2.0067	-0.450225
4th	M	-1.92067	-1.86976	-0.424962
4th	F	-1.97114	-1.96956	-0.462294
4th	M	-1.87442	-2.04925	-0.466152
4th	F	-1.69568	-1.97906	-0.366178
4th	F	-1.78296	-2.01904	-0.390747
4th	F	-1.72976	-1.8544	-0.340607
4th	M	-1.722	-1.82114	-0.235585
4th	F	-1.8826	-1.87025	-0.38781
4th	F	-1.88117	-1.92296	-0.350081
4th	M	-1.96477	-1.89825	-0.436994
4th	M	-1.82854	-1.99478	-0.464035
4th	F	-1.77741	-1.94059	-0.395472
4th	M	-1.85752	-2.12726	-0.44827
4th	F	-1.83024	-1.71381	-0.406736
4th	F	-1.81982	-1.81588	-0.35394
4th	F	-1.73004	-1.93607	-0.378398
4th	M	-2.01323	-2.01809	-0.497204
4th	F	-1.91507	-1.68495	-0.337507
4th	M	-1.93435	-2.23099	-0.527024
4th	M	-1.89191	-1.93934	-0.343145
4th	F	-1.85543	-1.74427	-0.275839
4th	M	-1.82804	-2.04077	-0.490435
4th	F	-1.81355	-1.72862	-0.350665
4th	F	-1.84814	-1.78317	-0.366481
4th	F	-1.75644	-1.85714	-0.358268
4th	M	-1.92782	-1.85428	-0.441327
4th	M	-1.969	-2.0237	-0.498544
4th	M	-1.89805	-1.96609	-0.498982
4th	M	-1.74427	-2.10535	-0.336374
4th	M	-2.02013	-1.75728	-0.483332
4th	F	-1.82638	-1.81599	-0.349974
4th	M	-1.82492	-1.98255	-0.4892
4th	F	-1.68386	-1.97515	-0.358972
4th	F	-1.76447	-1.81113	-0.315819
4th	F	-1.72732	-1.73684	-0.294684
4th	M	-1.93685	-1.83645	-0.453556
4th	M	-1.98843	-1.89201	-0.474502
4th	F	-1.86566	-1.86877	-0.327819
4th	M	-1.88522	-2.08959	-0.561489
4th	M	-1.89391	-1.93476	-0.449258
4th	M	-1.90306	-1.85886	-0.478156
4th	M	-1.8436	-1.77124	-0.284373
4th	M	-2.13112	-1.87121	-0.534885
4th	F	-1.69577	-2.16558	-0.337469
4th	M	-1.95343	-1.9276	-0.615127
4th	M	-1.99	-1.96146	-0.50604
4th	M	-1.88449	-2.06885	-0.45166
4th	M	-1.98645	-2.13407	-0.608271
4th	F	-1.87231	-1.98343	-0.392063
4th	M	-1.93289	-1.93252	-0.444011
4th	F	-1.77578	-1.94059	-0.33796
4th	M	-1.87322	-2.00257	-0.494755
4th	M	-1.77394	-1.93772	-0.439579
4th	M	-2.03953	-1.86227	-0.465517
4th	F	-1.78741	-2.10519	-0.331698
4th	M	-1.93018	-1.95617	-0.496168
4th	M	-1.84637	-1.97704	-0.394404
4th	F	-1.82492	-1.99379	-0.454693
4th	M	-1.94604	-2.15689	-0.489455
4th	F	-2.00135	-1.79604	-0.464947
4th	M	-1.87254	-2.09832	-0.444893
4th	F	-1.76483	-1.89678	-0.405596
4th	M	-1.89225	-1.8877	-0.448587
4th	M	-1.94321	-1.89463	-0.560936
4th	M	-1.87576	-2.01368	-0.497068
4th	F	-1.80463	-2.02752	-0.343384
4th	M	-1.76759	-2.10508	-0.467615
4th	M	-1.93768	-1.83998	-0.496237
4th	M	-2.01741	-1.89422	-0.449992
4th	F	-1.72448	-1.91464	-0.322019
4th	M	-1.78039	-1.82463	-0.502891
4th	F	-1.8531	-1.70567	-0.376255
4th	M	-1.96202	-1.999	-0.476319
4th	M	-1.95562	-2.36552	-0.576148
4th	M	-1.89565	-1.82478	-0.482619
4th	F	-1.7442	-1.74657	-0.357446
4th	M	-1.93248	-1.94858	-0.466978
4th	F	-1.76614	-1.78824	-0.324726
4th	M	-1.9791	-1.97564	-0.455771
4th	M	-1.89918	-1.78696	-0.435429
4th	M	-1.84512	-2.07309	-0.405121
4th	F	-1.89008	-1.81406	-0.369481
4th	M	-1.77877	-1.91446	-0.437576
4th	M	-1.83971	-2.05879	-0.382758
4th	M	-1.89551	-2.05943	-0.444507
4th	F	-1.82128	-1.87452	-0.353371
4th	M	-1.90326	-2.01977	-0.404427
4th	M	-1.81381	-1.85589	-0.432515
5th	M	-1.67566	-1.72925	-0.174172
5th	M	-1.81259	-1.6269	-0.160591
5th	M	-1.56049	-1.48174	-0.0776898
5th	M	-1.4985	-1.67403	-0.0801169
5th	F	-1.7353	-1.7292	-0.292754
5th	M	-1.53834	-1.53621	-0.0996766
5th	F	-1.52545	-1.53063	-0.0493577
5th	M	-1.66009	-1.5192	-0.0886879
5th	F	-1.78603	-1.73909	-0.260277
5th	M	-1.7157	-1.63171	-0.158434
5th	M	-1.53741	-1.74509	-0.0817966
5th	M	-1.92511	-2.08746	-0.393189
5th	M	-1.59513	-1.62864	-0.122738
5th	M	-1.6991	-1.57843	-0.235846
5th	F	-1.74074	-1.59322	-0.275356
5th	M	-1.63822	-1.47793	-0.0968992
5th	F	-1.60288	-1.50642	-0.0752092
5th	F	-1.74963	-1.53975	-0.309813
5th	F	-1.54706	-1.60729	-0.0330655
5th	M	-1.68125	-1.56798	-0.11677
5th	F	-1.62746	-1.4029	-0.0688779
5th	F	-1.66119	-1.46228	-0.031237
5th	M	-1.76175	-1.59856	-0.175816
5th	M	-1.77124	-1.7471	-0.186532
5th	M	-1.55906	-1.77397	-0.0909149
5th	M	-1.63264	-1.57391	-0.172114
5th	M	-1.60607	-1.7928	-0.154158
5th	M	-1.67428	-1.6735	-0.190925
5th	M	-1.7151	-1.64931	-0.252845
5th	M	-1.60262	-1.51576	-0.144657
5th	M	-1.65691	-1.67387	-0.138048
5th	M	-1.70631	-1.74235	-0.145645
5th	F	-1.60711	-1.59515	-0.0747808
5th	F	-1.55893	-1.56668	-0.046951
5th	F	-1.52083	-1.63142	-0.0738892
5th	F	-1.59655	-1.45032	-0.0602212
5th	F	-1.44331	-1.53829	0.0301421
5th	M	-1.66912	-1.45674	-0.0847427
5th	M	-1.75585	-1.69014	-0.300796
5th	F	-1.68664	-1.48436	-0.157447
5th	M	-1.82423	-1.58699	-0.194832
5th	M	-1.70542	-1.47616	-0.108524
5th	M	-1.65261	-1.65942	-0.173103
5th	M	-1.73535	-1.65265	-0.274914
5th	F	-1.69129	-1.57582	-0.344794
5th	M	-1.81784	-1.59164	-0.16066
5th	M	-1.74352	-1.84863	-0.196127
5th	M	-1.68006	-1.6991	-0.191283
5th	M	-1.64532	-1.54257	-0.186599
5th	F	-1.6648	-1.70086	-0.154902
5th	F	-1.60769	-1.36906	-0.0142413
5th	M	-1.59896	-1.46487	-0.0575752
5th	F	-1.81429	-1.49268	-0.161737
5th	M	-1.83851	-1.43067	-0.17087
5th	M	-1.79207	-1.85658	-0.250264
5th	M	-1.61541	-1.61306	-0.138119
5th	M	-1.50498	-1.59988	-0.0538033
5th	M	-1.73492	-1.63408	-0.214457
5th	F	-1.56357	-1.61674	-0.111967
5th	F	-1.43981	-1.47568	0.00650455
5th	F	-1.5259	-1.53462	-0.0362263
5th	M	-1.53049	-1.51892	-0.0522478
5th	F	-1.61106	-1.63731	-0.0585383
5th	M	-1.62637	-1.83818	-0.322247
5th	M	-1.65406	-1.73464	-0.198445
5th	M	-1.75173	-1.60067	-0.260831
5th	M	-2.01561	-2.21531	-0.257707
5th	M	-1.60144	-1.9396	-0.163993
5th	F	-1.49549	-1.67784	-0.0455838
5th	M	-1.58596	-1.48466	-0.0631094
5th	F	-1.65082	-1.61495	-0.105363
5th	F	-1.71656	-1.3465	-0.0754364
5th	F	-1.35989	-1.28867	0.0618444
5th	M	-1.75073	-1.66384	-0.177917
5th	M	-1.61912	-1.83681	-0.219208
5th	M	-2.10685	-1.92698	-0.342543
5th	M	-1.57643	-1.56556	-0.107699
5th	M	-1.53557	-1.7333	-0.0735495
5th	F	-1.55176	-1.65228	-0.180509
5th	F	-1.52478	-1.53963	-0.00389567
5th	F	-1.49954	-1.48625	0.0240175
5th	F	-1.63905	-1.3604	-0.0267798
5th	M	-1.52603	-1.83818	-0.0493091
5th	M	-1.65298	-1.78468	-0.155778
5th	F	-1.71894	-1.56503	-0.152903
5th	M	-1.7107	-1.82766	-0.232384
5th	M	-1.75716	-1.86303	-0.233833
5th	F	-1.68537	-1.66019	-0.0455308
5th	F	-1.7122	-1.68044	-0.126052
5th	F	-1.91632	-1.54423	-0.176656
6th	M	-1.61813	-1.23744	0.0782393
6th	M	-1.61345	-1.40788	-0.0144972
6th	M	-1.44388	-1.34315	0.138906
6th	F	-1.31698	-1.25446	0.22793
6th	F	-1.42713	-1.24036	0.139312
6th	M	-1.39436	-1.43442	0.0336368
6th	M	-1.48372	-1.35363	0.0799406
6th	M	-1.60641	-1.40644	-0.0971272
6th	M	-1.35651	-1.32646	0.113231
6th	M	-1.79202	-1.49948	0.129764
6th	M	-1.45891	-1.31077	0.101541
6th	M	-1.53229	-1.396	0.114768
6th	F	-1.57947	-1.18535	0.140948
6th	F	-1.5021	-1.19508	0.155976
6th	F	-1.32793	-1.374	0.209134
6th	F	-1.33494	-1.33218	0.24449
6th	F	-1.44654	-1.20655	0.226548
6th	F	-1.30179	-1.20194	0.225304
6th	F	-1.25756	-1.2568	0.283233
6th	F	-1.45561	-1.19159	0.162266
6th	F	-1.296	-1.34057	0.258805
6th	F	-1.31872	-1.36819	0.272633
6th	M	-1.5181	-1.44685	0.0637386
6th	M	-1.39245	-1.37676	0.14742
6th	M	-1.63903	-1.56594	-0.0180139
6th	M	-1.64043	-1.20717	0.0366768
6th	F	-1.59917	-1.25125	0.288643
6th	F	-1.32548	-1.44315	0.190839
6th	F	-1.37103	-1.22377	0.243782
6th	M	-1.3423	-1.16369	0.259264
6th	M	-1.50008	-1.48664	0.0675395
6th	M	-1.52893	-1.30773	0.0394815
6th	F	-1.5378	-1.32878	0.151627
6th	M	-1.59518	-1.30426	0.163728
6th	F	-1.65714	-1.29997	0.0266313
6th	F	-1.82989	-1.44003	0.289544
6th	F	-1.43341	-1.29742	0.276365
6th	M	-1.46431	-1.45523	0.0938313
6th	F	-1.28044	-1.3217	0.216667
6th	M	-1.381	-1.30616	0.0666464
6th	F	-1.42392	-1.40872	0.117513
6th	F	-1.63774	-1.23535	0.179629
6th	M	-1.65177	-1.4901	-0.0688117
6th	F	-1.27406	-1.30357	0.300406
6th	M	-1.45917	-1.50903	0.0958908
6th	F	-1.39329	-1.19343	0.255805
6th	M	-1.6644	-1.36068	-0.0273113
6th	M	-1.65708	-1.61786	-0.0507418
6th	M	-1.43279	-1.36625	0.13787
6th	M	-1.47502	-1.31432	0.108122
6th	M	-1.49278	-1.429	0.0822898
6th	M	-1.44367	-1.46829	0.0152759
6th	M	-1.54557	-1.49595	0.126995
6th	M	-1.35057	-1.28418	0.104709
Adult	F	-1.59339	-1.31116	0.265996
Adult	F	-1.70985	-1.26602	0.17467
Adult	F	-1.63376	-1.19451	0.23515
Adult	M	-1.79352	-1.39871	0.104999
Adult	M	-1.78832	-1.35021	0.086253
Adult	M	-1.83215	-1.33649	0.067703
Adult	F	-1.63882	-1.21316	0.241994
Adult	F	-1.48772	-1.12256	0.349957
Adult	M	-1.65506	-1.28395	0.126001
Adult	M	-1.7463	-1.3613	0.0401274
Adult	M	-1.83416	-1.32413	0.106667
Adult	F	-1.8767	-1.35567	0.123263
Adult	M	-1.82673	-1.30942	0.101231
Adult	M	-1.77859	-1.34294	0.0973614
Adult	M	-1.81747	-1.27466	0.13491
Adult	F	-1.59616	-1.28375	0.198465
Adult	M	-1.61329	-1.30908	0.108497
Adult	M	-1.70675	-1.28739	0.0977431
Adult	F	-1.75114	-1.38496	0.106191
Adult	F	-1.41259	-1.11011	0.307368
Adult	F	-1.64463	-1.30375	0.280874
Adult	M	-1.73447	-1.3106	0.0544598
Adult	M	-1.68599	-1.33216	0.103222
Adult	F	-1.60102	-1.2284	0.248071
Adult	F	-1.67685	-1.22017	0.242169
Adult	M	-1.68867	-1.36527	0.0721396
Adult	M	-1.83741	-1.46335	-0.00331324
Adult	F	-1.78851	-1.22355	0.240025
Adult	F	-1.47919	-1.14392	0.298984
Adult	F	-1.63305	-1.22975	0.208871
Adult	M	-1.85496	-1.32408	0.0588055
Adult	F	-1.84524	-1.33646	0.0947156
Adult	F	-1.72031	-1.26739	0.242392
Adult	F	-1.42472	-1.16602	0.256982
Adult	M	-1.77736	-1.27325	0.108903
Adult	M	-1.74931	-1.26986	0.12969
Adult	F	-1.72026	-1.26047	0.177998
Adult	M	-1.7093	-1.32078	0.0904697
Adult	M	-1.97638	-1.43251	-0.0270108
Adult	M	-1.80998	-1.47184	-0.0581905
Adult	M	-1.53849	-1.35745	0.0442261
Adult	F	-1.83434	-1.31503	0.152839
Adult	M	-1.71128	-1.35149	0.124145
Adult	M	-1.75181	-1.3443	0.10075
Adult	F	-1.69596	-1.25742	0.199097
Adult	F	-1.59331	-1.17243	0.284363
Adult	M	-1.82356	-1.50802	-0.0700194
Adult	F	-1.70441	-1.25962	0.218614
Adult	M	-1.53832	-1.23842	0.189911
Adult	M	-1.88546	-1.40209	0.0229642
Adult	M	-1.73639	-1.14847	0.184038
Adult	F	-1.76153	-1.38535	0.164799
Adult	F	-1.77307	-1.24733	0.155549
