# Supplementary material for: Body mass and growth rates predict protein intake across animals
Source: eLife. 2024 Nov 11;13:e88933. doi: 10.7554/eLife.88933 (PMC11587531; doi:10.7554/eLife.88933)
Supplement: Figure 3—source data 2. [file elife-88933-fig3-data2.xlsx]

## Sheet: Sheet1
Figure 3- Source Data 2
	Fish						Median
	Log(body mass in grams)	Log(Protein consumption in grams)					Log(body mass in grams)	Log(Protein consumption in grams)
	-1.82391	-2.28658				Locust	-0.498763	-1.77672
	-1.82391	-2.98555				Fish	0.477121	-0.995311
	-1.69897	-2.73567				Rat	1.88593	-0.120822
	-1.52288	-2.61757				Chicken	2.80944	1.00087
	-1.39794	-2.63876				Cat	3.15957	1.11517
	-0.69897	-2.16164				Pig	4.78702	2.14502
	-0.522879	-2.2074				Caribou	5.01056	2.79309
	-0.522879	-1.90637				Dairy cattle	5.41593	2.72299
	0	-0.939794
	0.20412	-1.23052
	0.30103	-0.995311
	0.39794	-0.696756
	0.69897	-0.735674
	0.740363	-0.72231
	0.778151	-1.01551
	1	-0.939794
	2	0.361236
	1.81291	-0.126881
	1.44716	-0.191606
	1.25527	-0.429249
	1.23045	-0.408315
	1.17609	-1.03131
	0.778151	-0.957523
	0.778151	-0.860613
	0.740363	-0.81922
	0.69897	-0.793666
	0.477121	-1.01551
	0.477121	-0.90637
	0.431364	-1.03131
	0.146128	-1.15021
	-0.30103	-1.79367
	Rat
	Log(body mass in grams)	Log(Protein consumption in grams)
	0.826075	-0.619789
	1.17898	-0.69897
	1.27875	-0.39794
	1.42325	-0.544068
	1.59439	-0.154902
	1.88593	0.0687158
	2.09691	0.184286
	2.26245	0.063387
	2.35411	0.407755
	2.49554	-0.120822
	2.54407	0.132626
	Chicken
	Log(body mass in grams)	Log(Protein consumption in grams)
	2.11394	0.669169
	2.14613	0.582019
	2.17609	0.603044
	2.23045	0.771683
	2.27875	0.694169
	2.32222	0.740525
	2.36173	0.74882
	2.41497	0.814591
	2.44716	0.768329
	2.47712	0.824071
	2.51851	0.772795
	2.5682	0.865912
	2.59106	0.867254
	2.62325	0.948701
	2.64345	0.816102
	2.68124	0.967369
	2.70757	0.983563
	2.73239	0.990851
	2.77085	0.986798
	2.79934	0.983734
	2.81954	1.01089
	2.8451	1.02135
	2.87506	1.05611
	2.90309	1.06086
	2.91908	1.0748
	2.93952	1.03795
	2.95904	1.04691
	2.97772	1.03432
	2.99564	1.07271
	3.01284	1.1049
	3.02938	1.06314
	3.04922	1.12113
	3.06819	1.11524
	3.08636	1.12387
	3.10037	1.12387
	3.11059	1.13486
	3.12057	1.1085
	3.14613	1.09734
	3.15534	1.1049
	3.17609	1.11411
	Cat
	Log(body mass in grams)	Log(Protein consumption in grams)
	2.69461	0.733523
	2.76938	0.866287
	2.84136	0.751183
	2.89542	0.837431
	2.9345	1.11059
	3.0406	1.13751
	3.08884	1.11517
	3.12775	1.09972
	3.15957	1.06939
	3.18921	1.06427
	3.22063	1.16264
	3.25285	1.16268
	3.27875	1.15381
	3.30038	1.13765
	3.32284	1.17942
	3.32879	1.16606
	3.35641	1.15229
	Pig
	Log(body mass in grams)	Log(Protein consumption in grams)
	3.69897	1.74036
	4.39794	2.07918
	4.69897	2.17609
	4.87506	2.20412
	5	2.19033
	5.17609	2.11394
	Caribou
	Log(body mass in grams)	Log(Protein consumption in grams)
	4.32827	2.01485
	4.35366	2.0785
	4.37741	2.134
	4.39971	2.1832
	4.42072	2.22739
	4.44056	2.2675
	4.45935	2.30422
	4.47719	2.33807
	4.49415	2.36947
	4.51032	2.39876
	4.52575	2.42619
	4.54051	2.45199
	4.55464	2.47635
	4.56819	2.49941
	4.58121	2.52131
	4.59372	2.54216
	4.60576	2.56205
	4.61736	2.58107
	4.62855	2.59929
	4.63935	2.617
	4.64978	2.617
	4.65987	2.617
	4.66964	2.617
	4.67909	2.617
	4.68825	2.617
	4.69714	2.617
	4.70576	2.617
	4.71413	2.617
	4.72225	2.617
	4.73016	2.617
	4.73784	2.617
	4.74532	2.617
	4.75259	2.617
	4.75968	2.617
	4.76658	2.617
	4.77331	2.617
	4.77987	2.617
	4.78627	2.617
	4.79251	2.617
	4.7986	2.617
	4.80455	2.617
	4.81037	2.617
	4.81604	2.617
	4.82159	2.617
	4.82702	2.617
	4.83232	2.617
	4.83751	2.617
	4.84259	2.617
	4.84756	2.617
	4.85242	2.617
	4.85718	2.79309
	4.86185	2.79309
	4.86642	2.79309
	4.87089	2.79309
	4.87528	2.79309
	4.87958	2.79309
	4.8838	2.79309
	4.88793	2.79309
	4.89198	2.79309
	4.89596	2.79309
	4.89986	2.79309
	4.90369	2.79309
	4.90745	2.79309
	4.91114	2.79309
	4.91476	2.79309
	4.91831	2.79309
	4.9218	2.79309
	4.92523	2.79309
	4.9286	2.79309
	4.93191	2.79309
	4.93516	2.79309
	4.93836	2.79309
	4.9415	2.79309
	4.94459	2.79309
	4.94762	2.79309
	4.95061	2.79309
	4.95354	2.79309
	4.95643	2.79309
	4.95926	2.79309
	4.96206	2.79309
	4.9648	2.79309
	4.9675	2.79309
	4.97016	2.79309
	4.97278	2.79309
	4.97535	2.79309
	4.97789	2.79309
	4.98038	2.79309
	4.98284	2.79309
	4.98526	2.79309
	4.98764	2.79309
	4.98998	2.79309
	4.99229	2.79309
	4.99456	2.79309
	4.9968	2.79309
	4.99901	2.79309
	5.00118	2.79309
	5.00332	2.79309
	5.00543	2.79309
	5.0075	2.79309
	5.00955	2.79309
	5.01157	2.79309
	5.01356	2.79309
	5.01551	2.79309
	5.01745	2.79309
	5.01935	2.79309
	5.02122	2.79309
	5.02307	2.79309
	5.0249	2.79309
	5.02669	2.79309
	5.02847	2.79309
	5.03021	2.79309
	5.03194	2.79309
	5.03364	2.79309
	5.03531	2.79309
	5.03697	2.79309
	5.0386	2.79309
	5.0402	2.79309
	5.04179	2.79309
	5.04336	2.79309
	5.0449	2.79309
	5.04642	2.79309
	5.04792	2.79309
	5.04941	2.79309
	5.05087	2.79309
	5.05231	2.79309
	5.05374	2.79309
	5.05514	2.79309
	5.05653	2.79309
	5.0579	2.79309
	5.05925	2.79309
	5.06058	2.79309
	5.0619	2.79309
	5.0632	2.79309
	5.06448	2.79309
	5.06574	2.79309
	5.06699	2.79309
	5.06823	2.79309
	5.06945	2.79309
	5.07065	2.79309
	5.07184	2.79309
	5.07301	2.79309
	5.07416	2.79309
	5.07531	2.79309
	5.07644	2.79309
	5.07755	2.79309
	5.07865	2.79309
	5.07974	2.79309
	5.08081	2.79309
	5.08187	2.79309
	5.08292	2.79309
	5.08395	2.79309
	5.08497	2.79309
	5.08598	2.79309
	5.08698	2.79309
	5.08796	2.79309
	5.08893	2.79309
	5.08989	2.79309
	5.09084	2.79309
	5.09178	2.79309
	5.0927	2.79309
	5.09362	2.79309
	5.09452	2.79309
	5.09542	2.79309
	5.0963	2.79309
	5.09717	2.79309
	5.09803	2.79309
	5.09888	2.79309
	5.09972	2.79309
	5.10055	2.79309
	5.10137	2.79309
	5.10219	2.79309
	5.10299	2.79309
	5.10378	2.79309
	5.10456	2.79309
	5.10534	2.79309
	5.1061	2.79309
	5.10686	2.79309
	5.1076	2.79309
	5.10834	2.79309
	5.10907	2.79309
	5.10979	2.79309
	5.11051	2.79309
	5.11121	2.79309
	5.11191	2.79309
	5.11259	2.79309
	5.11328	2.79309
	5.11395	2.79309
	5.11461	2.79309
	5.11527	2.79309
	5.11592	2.79309
	5.11656	2.79309
	5.1172	2.79309
	5.11782	2.79309
	5.11845	2.79309
	5.11906	2.79309
	5.11967	2.79309
	5.12027	2.79309
	5.12086	2.79309
	5.12144	2.79309
	5.12202	2.79309
	Dairy cattle
	Log(body mass in grams)	Log(Protein consumption in grams)
	4.43482	2.07165
	4.73585	2.34687
	4.86079	2.48918
	4.9577	2.60606
	5.05461	2.6941
	5.08804	2.74303
	5.16182	2.76048
	5.23646	2.72113
	5.29014	2.72113
	5.30989	2.74658
	5.35564	2.76726
	5.37268	2.72486
	5.39704	2.6901
	5.43482	2.63894
	5.44906	2.66527
	5.46285	2.6479
	5.48275	2.68606
	5.49552	2.6901
	5.51401	2.75009
	5.53173	2.8028
	5.54877	2.77062
	5.57049	2.81804
	5.58609	2.82693
	5.60116	2.82103
	5.61092	2.85533
	5.6344	2.79339
